# Supplementary material for: Comparative efficacy of onsite, digital, and other settings for cognitive behavioral therapy for insomnia: a systematic review and network meta-analysis
Source: Springer Nature journal article supplement (doi:10.1038/s41598-023-28853-0), 2023-02-02

## ***Online Supplementary Materials***

### ***Comparative efficacy of onsite, digital, and other settings for cognitive behavioral therapy for insomnia: a systematic review and network meta-analysis***

Simon L., Steinmetz L., Feige B., Benz F., Spiegelhalder K., Baumeister H.

|                                                                                 |    |
|---------------------------------------------------------------------------------|----|
| Supplementary Appendix S1. PRISMA for network meta-analyses .....               | 2  |
| Supplementary Appendix S2. Search string .....                                  | 6  |
| Supplementary Appendix S3. P-Scores .....                                       | 7  |
| Supplementary Table S1. Primary and secondary outcomes.....                     | 10 |
| Supplementary Table S2. Study characteristics .....                             | 11 |
| Supplementary Table S3. Network meta-analyses of the secondary outcomes .....   | 18 |
| Supplementary Figure S1. Network plots and forest plots secondary outcomes..... | 19 |
| Supplementary Figure S2. Net heat plots .....                                   | 22 |
| Supplementary Figure S3. Risk of Bias- summary figure.....                      | 36 |
| Supplementary Figure S4. Risk of Bias- detailed figure.....                     | 37 |
| Supplementary Figures S5. Comparison-adjusted funnel plots .....                | 38 |

## Supplementary Appendix S1. PRISMA for network meta-analyses

| Section/Topic             | Item # | Checklist Item                                                                                                                                                                                                                                                                                                                                                                                                                                                                                                                                                                                                                                                                                                                                                                          | Reported on Page # |
|---------------------------|--------|-----------------------------------------------------------------------------------------------------------------------------------------------------------------------------------------------------------------------------------------------------------------------------------------------------------------------------------------------------------------------------------------------------------------------------------------------------------------------------------------------------------------------------------------------------------------------------------------------------------------------------------------------------------------------------------------------------------------------------------------------------------------------------------------|--------------------|
| <b>TITLE</b>              |        |                                                                                                                                                                                                                                                                                                                                                                                                                                                                                                                                                                                                                                                                                                                                                                                         |                    |
| Title                     | 1      | Identify the report as a systematic review <i>incorporating a network meta-analysis (or related form of meta-analysis)</i> .                                                                                                                                                                                                                                                                                                                                                                                                                                                                                                                                                                                                                                                            | 1                  |
| <b>ABSTRACT</b>           |        |                                                                                                                                                                                                                                                                                                                                                                                                                                                                                                                                                                                                                                                                                                                                                                                         |                    |
| Structured summary        | 2      | Provide a structured summary including, as applicable:<br><b>Background:</b> main objectives<br><b>Methods:</b> data sources; study eligibility criteria, participants, and interventions; study appraisal; and <i>synthesis methods, such as network meta-analysis</i> .<br><b>Results:</b> number of studies and participants identified; summary estimates with corresponding confidence/credible intervals; <i>treatment rankings may also be discussed. Authors may choose to summarize pairwise comparisons against a chosen treatment included in their analyses for brevity.</i><br><b>Discussion/Conclusions:</b> limitations; conclusions and implications of findings.<br><b>Other:</b> primary source of funding; systematic review registration number with registry name. | 2                  |
| <b>INTRODUCTION</b>       |        |                                                                                                                                                                                                                                                                                                                                                                                                                                                                                                                                                                                                                                                                                                                                                                                         |                    |
| Rationale                 | 3      | Describe the rationale for the review in the context of what is already known, <i>including mention of why a network meta-analysis has been conducted</i> .                                                                                                                                                                                                                                                                                                                                                                                                                                                                                                                                                                                                                             | 3-4                |
| Objectives                | 4      | Provide an explicit statement of questions being addressed, with reference to participants, interventions, comparisons, outcomes, and study design (PICOS).                                                                                                                                                                                                                                                                                                                                                                                                                                                                                                                                                                                                                             | 4                  |
| <b>METHODS</b>            |        |                                                                                                                                                                                                                                                                                                                                                                                                                                                                                                                                                                                                                                                                                                                                                                                         |                    |
| Protocol and registration | 5      | Indicate whether a review protocol exists and if and where it can be accessed (e.g., Web address); and, if available, provide registration information, including registration number.                                                                                                                                                                                                                                                                                                                                                                                                                                                                                                                                                                                                  | 8                  |
| Eligibility criteria      | 6      | Specify study characteristics (e.g., PICOS, length of follow-up) and report characteristics (e.g., years considered, language, publication status) used as criteria for eligibility, giving rationale. <i>Clearly describe eligible treatments included in the treatment network, and note whether any have been clustered or merged into the same node (with justification).</i>                                                                                                                                                                                                                                                                                                                                                                                                       | 5,7                |
| Information sources       | 7      | Describe all information sources (e.g., databases with dates of coverage, contact with study authors to                                                                                                                                                                                                                                                                                                                                                                                                                                                                                                                                                                                                                                                                                 | 5                  |

|                                        |           |                                                                                                                                                                                                                                                                                                                                                                                                                        |                                              |
|----------------------------------------|-----------|------------------------------------------------------------------------------------------------------------------------------------------------------------------------------------------------------------------------------------------------------------------------------------------------------------------------------------------------------------------------------------------------------------------------|----------------------------------------------|
|                                        |           | identify additional studies) in the search and date last searched.                                                                                                                                                                                                                                                                                                                                                     |                                              |
| Search                                 | 8         | Present full electronic search strategy for at least one database, including any limits used, such that it could be repeated.                                                                                                                                                                                                                                                                                          | Supplementary Appendix S2                    |
| Study selection                        | 9         | State the process for selecting studies (i.e., screening, eligibility, included in systematic review, and, if applicable, included in the meta-analysis).                                                                                                                                                                                                                                                              | 5-6                                          |
| Data collection process                | 10        | Describe method of data extraction from reports (e.g., piloted forms, independently, in duplicate) and any processes for obtaining and confirming data from investigators.                                                                                                                                                                                                                                             | 5                                            |
| Data items                             | 11        | List and define all variables for which data were sought (e.g., PICOS, funding sources) and any assumptions and simplifications made.                                                                                                                                                                                                                                                                                  | 5-6, Supplementary Table S1                  |
| <b>Geometry of the network</b>         | <b>S1</b> | Describe methods used to explore the geometry of the treatment network under study and potential biases related to it. This should include how the evidence base has been graphically summarized for presentation, and what characteristics were compiled and used to describe the evidence base to readers.                                                                                                           | 6-7                                          |
| Risk of bias within individual studies | 12        | Describe methods used for assessing risk of bias of individual studies (including specification of whether this was done at the study or outcome level), and how this information is to be used in any data synthesis.                                                                                                                                                                                                 | 8                                            |
| Summary measures                       | 13        | State the principal summary measures (e.g., risk ratio, difference in means). <i>Also describe the use of additional summary measures assessed, such as treatment rankings and surface under the cumulative ranking curve (SUCRA) values, as well as modified approaches used to present summary findings from meta-analyses.</i>                                                                                      | 6                                            |
| Planned methods of analysis            | 14        | Describe the methods of handling data and combining results of studies for each network meta-analysis. This should include, but not be limited to: <ul style="list-style-type: none"> <li>• <i>Handling of multi-arm trials;</i></li> <li>• <i>Selection of variance structure;</i></li> <li>• <i>Selection of prior distributions in Bayesian analyses; and</i></li> <li>• <i>Assessment of model fit.</i></li> </ul> | 6                                            |
| <b>Assessment of Inconsistency</b>     | <b>S2</b> | Describe the statistical methods used to evaluate the agreement of direct and indirect evidence in the treatment network(s) studied. Describe efforts taken to address its presence when found.                                                                                                                                                                                                                        | 8                                            |
| Risk of bias across studies            | 15        | Specify any assessment of risk of bias that may affect the cumulative evidence (e.g., publication bias, selective reporting within studies).                                                                                                                                                                                                                                                                           | 8                                            |
| Additional analyses                    | 16        | Describe methods of additional analyses if done, indicating which were pre-specified. This may include, but not be limited to, the following: <ul style="list-style-type: none"> <li>• Sensitivity or subgroup analyses;</li> <li>• Meta-regression analyses;</li> </ul>                                                                                                                                               | <i>no additional analyses were conducted</i> |

- *Alternative formulations of the treatment network; and*
- *Use of alternative prior distributions for Bayesian analyses (if applicable).*

## RESULTST†

|                                          |           |                                                                                                                                                                                                                                                                                                                                                                                                                                                              |                                     |
|------------------------------------------|-----------|--------------------------------------------------------------------------------------------------------------------------------------------------------------------------------------------------------------------------------------------------------------------------------------------------------------------------------------------------------------------------------------------------------------------------------------------------------------|-------------------------------------|
| Study selection                          | 17        | Give numbers of studies screened, assessed for eligibility, and included in the review, with reasons for exclusions at each stage, ideally with a flow diagram.                                                                                                                                                                                                                                                                                              | 9 (Figure 1)                        |
| <b>Presentation of network structure</b> | <b>S3</b> | Provide a network graph of the included studies to enable visualization of the geometry of the treatment network.                                                                                                                                                                                                                                                                                                                                            | 11 (Figure 2)                       |
| <b>Summary of network geometry</b>       | <b>S4</b> | Provide a brief overview of characteristics of the treatment network. This may include commentary on the abundance of trials and randomized patients for the different interventions and pairwise comparisons in the network, gaps of evidence in the treatment network, and potential biases reflected by the network structure.                                                                                                                            | 10                                  |
| Study characteristics                    | 18        | For each study, present characteristics for which data were extracted (e.g., study size, PICOS, follow-up period) and provide the citations.                                                                                                                                                                                                                                                                                                                 | Supplementary Table S2              |
| Risk of bias within studies              | 19        | Present data on risk of bias of each study and, if available, any outcome level assessment.                                                                                                                                                                                                                                                                                                                                                                  | 15, Supplementary Figures S3 and S4 |
| Results of individual studies            | 20        | For all outcomes considered (benefits or harms), present, for each study: 1) simple summary data for each intervention group, and 2) effect estimates and confidence intervals. <i>Modified approaches may be needed to deal with information from larger networks.</i>                                                                                                                                                                                      | 10-15                               |
| Synthesis of results                     | 21        | Present results of each meta-analysis done, including confidence/credible intervals. <i>In larger networks, authors may focus on comparisons versus a particular comparator (e.g. placebo or standard care), with full findings presented in an appendix. League tables and forest plots may be considered to summarize pairwise comparisons.</i> If additional summary measures were explored (such as treatment rankings), these should also be presented. | 10-15                               |
| <b>Exploration for inconsistency</b>     | <b>S5</b> | Describe results from investigations of inconsistency. This may include such information as measures of model fit to compare consistency and inconsistency models, <i>P</i> values from statistical tests, or summary of inconsistency estimates from different parts of the treatment network.                                                                                                                                                              | 10-15, Supplementary Figure S2      |
| Risk of bias across studies              | 22        | Present results of any assessment of risk of bias across studies for the evidence base being studied.                                                                                                                                                                                                                                                                                                                                                        | 15, Supplementary Figure S5         |
| Results of additional                    | 23        | Give results of additional analyses, if done (e.g., sensitivity or subgroup analyses, meta-regression                                                                                                                                                                                                                                                                                                                                                        | <i>no additional analyses were</i>  |

|                     |    |                                                                                                                                                                                                                                                                                                                                                                                                                                |           |
|---------------------|----|--------------------------------------------------------------------------------------------------------------------------------------------------------------------------------------------------------------------------------------------------------------------------------------------------------------------------------------------------------------------------------------------------------------------------------|-----------|
| analyses            |    | analyses, <i>alternative network geometries studied, alternative choice of prior distributions for Bayesian analyses</i> , and so forth).                                                                                                                                                                                                                                                                                      | conducted |
| <b>DISCUSSION</b>   |    |                                                                                                                                                                                                                                                                                                                                                                                                                                |           |
| Summary of evidence | 24 | Summarize the main findings, including the strength of evidence for each main outcome; consider their relevance to key groups (e.g., healthcare providers, users, and policy-makers).                                                                                                                                                                                                                                          | 15-17     |
| Limitations         | 25 | Discuss limitations at study and outcome level (e.g., risk of bias), and at review level (e.g., incomplete retrieval of identified research, reporting bias). <i>Comment on the validity of the assumptions, such as transitivity and consistency. Comment on any concerns regarding network geometry (e.g., avoidance of certain comparisons).</i>                                                                            | 17-18     |
| Conclusions         | 26 | Provide a general interpretation of the results in the context of other evidence, and implications for future research.                                                                                                                                                                                                                                                                                                        | 18-19     |
| <b>FUNDING</b>      |    |                                                                                                                                                                                                                                                                                                                                                                                                                                |           |
| Funding             | 27 | Describe sources of funding for the systematic review and other support (e.g., supply of data); role of funders for the systematic review. This should also include information regarding whether funding has been received from manufacturers of treatments in the network and/or whether some of the authors are content experts with professional conflicts of interest that could affect use of treatments in the network. | 8         |

---

From: Hutton, B. *et al.* The PRISMA Extension Statement for Reporting of Systematic Reviews Incorporating Network Meta-analyses of Health Care Interventions: Checklist and Explanations. *Ann. Intern. Med.* **162**, 777–784 (2015).

## Supplementary Appendix S2. Search string

The search strings were developed by combining terms indicative of insomnia, CBT-I, and CBT-I components. The databases PsycINFO, PsycARTICLES, MEDLINE, PubMed, and CINAHL were searched for publications from 1987, which is the publication date of DSM-III-R (American Psychiatric Association, 1987), until November 23rd, 2021.

### Pubmed | results by year 1987

(cognitive therapy[Title/Abstract] OR cognitive behavio\* therapy[Title/Abstract] OR behavio\* therapy[Title/Abstract] OR sleep behavior therapy[Title/Abstract] OR CBT[Title/Abstract] OR CBT-I[Title/Abstract] OR paradoxical intention[Title/Abstract] OR paradoxical techniques[Title/Abstract] OR cognitive control[Title/Abstract] OR cognitive reconstr\*[Title/Abstract] OR cognitive restruct\*[Title/Abstract] OR cognitive refocusing[Title/Abstract] OR imagery[Title/Abstract] OR problem solving[Title/Abstract] OR constructive worry[Title/Abstract] OR stimulus control[Title/Abstract] OR sleep restriction[Title/Abstract] OR sleep hygiene[Title/Abstract] OR psychoeducation[Title/Abstract] OR relaxation[Title/Abstract])

AND

(insomni\*[Title/Abstract] OR sleep initiation[Title/Abstract] OR sleep maintenance[Title/Abstract])

**Medline, PsychInfo, Cinahl, PsycArticles** searched via Ebsco Host | Published Date: from 1987, Field: AB Abstract

("cognitive therapy" OR "cognitive behavio\* therapy" OR "behavio\* therapy" OR "sleep behavior therapy" OR "CBT-I" OR "CBT" OR "paradoxical intention" OR "paradoxical techniques" OR "cognitive control" OR "cognitive reconstr\*" OR "cognitive restruct\*" OR "cognitive refocusing" OR "imagery" OR "problem solving" OR "constructive worry" OR "stimulus control" OR "sleep restriction" OR "sleep hygiene" OR "psychoeducation" OR "relaxation")

AND

"insomni\*" or "sleep initiation" or "sleep maintenance"

## Supplementary Appendix S3. P-Scores

### P-Scores: Insomnia severity

|                        |      |
|------------------------|------|
| F2F                    | 0.88 |
| Telehealth             | 0.84 |
| Group                  | 0.71 |
| Guided bibliotherapy   | 0.69 |
| Smartphone             | 0.68 |
| Unguided iCBT-I        | 0.54 |
| Guided iCBT-I          | 0.48 |
| Unguided bibliotherapy | 0.46 |
| Placebo                | 0.42 |
| SHE                    | 0.31 |
| TAU                    | 0.25 |
| Active contact control | 0.19 |
| WL                     | 0.07 |

### P-Scores: Subjective sleep quality

|                        |      |
|------------------------|------|
| Guided bibliotherapy   | 0.83 |
| F2F                    | 0.82 |
| Group                  | 0.78 |
| Smartphone             | 0.74 |
| Telehealth             | 0.71 |
| Guided iCBT-I          | 0.63 |
| Unguided iCBT-I        | 0.49 |
| Unguided bibliotherapy | 0.45 |
| TAU                    | 0.38 |
| Placebo                | 0.30 |
| SHE                    | 0.18 |
| Active contact control | 0.14 |
| WL                     | 0.14 |

### P-Scores: Subjective total sleep time

|                        |      |
|------------------------|------|
| Unguided bibliotherapy | 0.89 |
| Group                  | 0.88 |
| Guided iCBT-I          | 0.75 |
| Guided bibliotherapy   | 0.71 |
| TAU                    | 0.61 |
| F2F                    | 0.48 |
| Unguided iCBT-I        | 0.45 |
| Telehealth             | 0.40 |
| SHE                    | 0.29 |
| WL                     | 0.19 |
| Active contact control | 0.17 |
| Placebo                | 0.17 |

### P-Scores: Subjective sleep efficiency

|                        |      |
|------------------------|------|
| Group                  | 0.96 |
| Guided bibliotherapy   | 0.83 |
| F2F                    | 0.68 |
| Telehealth             | 0.66 |
| Guided iCBT-I          | 0.59 |
| TAU                    | 0.58 |
| Unguided iCBT-I        | 0.57 |
| Unguided bibliotherapy | 0.51 |
| WL                     | 0.21 |
| Placebo                | 0.17 |
| Active contact control | 0.16 |
| SHE                    | 0.08 |

**P-Scores: Subjective sleep onset latency**

|                        |      |
|------------------------|------|
| Guided bibliotherapy   | 0.92 |
| Telehealth             | 0.87 |
| Group                  | 0.81 |
| F2F                    | 0.81 |
| Guided iCBT-I          | 0.60 |
| Unguided iCBT-I        | 0.54 |
| Unguided bibliotherapy | 0.53 |
| WL                     | 0.27 |
| TAU                    | 0.26 |
| SHE                    | 0.24 |
| Active contact control | 0.10 |
| Placebo                | 0.05 |

**P-Scores: Subjective wake after sleep onset**

|                        |      |
|------------------------|------|
| Group                  | 0.91 |
| Telehealth             | 0.83 |
| F2F                    | 0.72 |
| Guided bibliotherapy   | 0.67 |
| Unguided iCBT-I        | 0.62 |
| Guided iCBT-I          | 0.59 |
| TAU                    | 0.55 |
| Unguided bibliotherapy | 0.48 |
| Placebo                | 0.26 |
| WL                     | 0.16 |
| SHE                    | 0.14 |
| Active contact control | 0.09 |

**P-Scores: Objective total sleep time**

|                        |      |
|------------------------|------|
| WL                     | 0.94 |
| Telehealth             | 0.85 |
| Active contact control | 0.72 |
| F2F                    | 0.45 |
| SHE                    | 0.43 |
| Unguided iCBT-I        | 0.32 |
| Group                  | 0.16 |
| Placebo                | 0.13 |

**P-Scores: Objective sleep efficiency**

|                        |      |
|------------------------|------|
| Telehealth             | 0.85 |
| F2F                    | 0.77 |
| SHE                    | 0.59 |
| Group                  | 0.53 |
| Unguided iCBT-I        | 0.49 |
| Active contact control | 0.43 |
| WL                     | 0.32 |
| Placebo                | 0.29 |
| TAU                    | 0.23 |

**P-Scores: Objective sleep onset latency**

|                        |      |
|------------------------|------|
| Telehealth             | 0.86 |
| F2F                    | 0.82 |
| SHE                    | 0.68 |
| Active contact control | 0.55 |
| Unguided iCBT-I        | 0.42 |
| TAU                    | 0.30 |
| Group                  | 0.28 |
| WL                     | 0.09 |



**P-Scores: Objective wake after sleep onset**

|                        |      |
|------------------------|------|
| Group                  | 0.83 |
| F2F                    | 0.63 |
| Unguided iCBT-I        | 0.61 |
| SHE                    | 0.58 |
| TAU                    | 0.45 |
| WL                     | 0.43 |
| Placebo                | 0.27 |
| Active contact control | 0.19 |

**P-Scores: Response rates**

|                        |      |
|------------------------|------|
| Guided bibliotherapy   | 0.82 |
| Unguided iCBT-I        | 0.73 |
| Telehealth             | 0.69 |
| F2F                    | 0.64 |
| Unguided bibliotherapy | 0.47 |
| Group                  | 0.46 |
| SHE                    | 0.41 |
| Guided iCBT-I          | 0.26 |
| WL                     | 0.03 |

**P-Scores: Remission rates**

|                        |      |
|------------------------|------|
| Telehealth             | 0.89 |
| F2F                    | 0.85 |
| Guided bibliotherapy   | 0.80 |
| Unguided iCBT-I        | 0.57 |
| Unguided bibliotherapy | 0.47 |
| Group                  | 0.35 |
| Guided iCBT-I          | 0.25 |
| SHE                    | 0.19 |
| WL                     | 0.12 |

**P-Scores: Intervention completion rates**

|                        |      |
|------------------------|------|
| Group                  | 0.83 |
| Unguided iCBT-I        | 0.7  |
| Guided iCBT-I          | 0.62 |
| F2F                    | 0.58 |
| SHE                    | 0.55 |
| Placebo                | 0.54 |
| Smartphone             | 0.54 |
| Guided bibliotherapy   | 0.45 |
| TAU                    | 0.43 |
| Telehealth             | 0.42 |
| Active contact control | 0.37 |
| Unguided bibliotherapy | 0.3  |
| WL                     | 0.18 |

Supplementary Table S1. Primary and secondary outcomes

| Outcome                                       | Measured via                                                                                                                     | Order <sup>1</sup>                                  | Effect size                                                                    |
|-----------------------------------------------|----------------------------------------------------------------------------------------------------------------------------------|-----------------------------------------------------|--------------------------------------------------------------------------------|
| <b>Primary outcome</b>                        |                                                                                                                                  |                                                     |                                                                                |
| Insomnia severity                             | self-report questionnaires (e.g., Insomnia Severity Index (Bastien et al., 2001), Athens Insomnia Scale (Soldatos et al., 2000)) | ISI, other self-report questionnaires               | Standardized mean difference ( <i>SMD</i> )                                    |
| <b>Secondary outcomes</b>                     |                                                                                                                                  |                                                     |                                                                                |
| Subjective sleep quality                      | sleep diaries or self-report questionnaires (e.g., Pittsburgh Sleep Quality Index (PSQI); (Buysse et al., 1989))                 | PSQI, sleep diary, other self-report questionnaires | <i>SMD</i>                                                                     |
| Subjective total sleep Time                   | sleep diaries or self-report questionnaires                                                                                      | sleep diary, PSQI                                   | <i>SMD</i>                                                                     |
| Subjective sleep efficiency                   | sleep diaries or self-report questionnaires                                                                                      | sleep diary, PSQI                                   | <i>SMD</i>                                                                     |
| Subjective sleep onset latency                | sleep diaries or self-report questionnaires                                                                                      | sleep diary, PSQI                                   | <i>SMD</i>                                                                     |
| Subjective wake after sleep onset             | sleep diaries or self-report questionnaires                                                                                      | sleep diary, PSQI                                   | <i>SMD</i>                                                                     |
| Objective total sleep time                    | polysomnography or actigraphy                                                                                                    | polysomnography, accelerometer                      | <i>SMD</i>                                                                     |
| Objective sleep efficiency                    | polysomnography or actigraphy                                                                                                    | polysomnography, accelerometer                      | <i>SMD</i>                                                                     |
| Objective sleep onset latency                 | polysomnography or actigraphy                                                                                                    | polysomnography, accelerometer                      | <i>SMD</i>                                                                     |
| Objective wake after sleep onset              | polysomnography or actigraphy                                                                                                    | polysomnography, accelerometer                      | <i>SMD</i>                                                                     |
| Response (Clinically Significant Improvement) | pre-defined criterion pre-to-post-treatment (e.g., ≥8-point drop of the ISI score)                                               | ISI point-drop=≥8, SE increase ≥ 10%, other         | <i>SMD</i> (transformed through a Freeman-Tukey double arcsine transformation) |
| Remission                                     | pre-defined criterion post-treatment (e.g., ISI score<7)                                                                         | ISI score<7, SE≥85%, SOL<31, WASO<31, Other         | <i>SMD</i> (transformed through a Freeman-Tukey double arcsine transformation) |
| Intervention completion                       | Percentage of participants completing the intervention <sup>2</sup>                                                              |                                                     | <i>SMD</i> (transformed through a Freeman-Tukey double arcsine transformation) |

Note.<sup>1</sup>The order of the data sources depicts which data was preferred if there were several data for the construct. <sup>2</sup> Either as defined by authors or as depicted in the flowchart.

Supplementary Table S2. Study characteristics

| Study                 | Insomnia definition according to | N [Pre-Post] | Inclusion sleep comorbidity | Inclusion comorbidity | Use of sleep medication | Outcomes                                                                        | Setting                | Komponenten                              | Number of sessions | Duration of sessions                                     | Therapist specialization | n [Pre-Post] | Age [Years: Mean (SD)] | Sex [% Female] | Mean insomnia duration per group |
|-----------------------|----------------------------------|--------------|-----------------------------|-----------------------|-------------------------|---------------------------------------------------------------------------------|------------------------|------------------------------------------|--------------------|----------------------------------------------------------|--------------------------|--------------|------------------------|----------------|----------------------------------|
| Alessi et al. 2016    | ICSD-2                           | 159 - 150    | Partially excluded          | Partially excluded    | No restriction          | ISI, PSQI, SOL_diary, WASO_diary, SE_diary                                      | F2F                    | SHE, SR, SK, Cog                         | 5                  | 60 minutes                                               | Sleep coaches            | 54 - 52      | 72.1 (7.9)x            | 3.8x           | NA                               |
|                       |                                  |              |                             |                       |                         |                                                                                 | Group                  | SHE, SR, SK, Cog                         | 5                  | 60 minutes                                               | Sleep coaches            | 52 - 45*     | 72.1 (7.9)x            | 3.8x           | NA                               |
|                       |                                  |              |                             |                       |                         |                                                                                 | SHE                    | SHE                                      | 5                  | 60 minutes                                               | Sleep coaches            | 53 - 53      | 72.4 (7.3)             | 2.9            | NA                               |
| Arnedt et al. 2013    | RDC                              | 30 - 29      | Excluded                    | Partially excluded    | Required to be stable   | ISI, PSQI, SOL_diary, WASO_diary, SE_diary, TST_diary, SQ_diary, Rem, Res, Comp | Guided bibliotherapy   | SHE, SR, SK, Cog_restruct                | 4 to 8             | 15 - 60-minutes (contingent on treatment response)       | Psychologist             | 18 - 15      | 38.1 (14.6)            | 100            | 9.2 (10.8)                       |
|                       |                                  |              |                             |                       |                         |                                                                                 | SHE                    | SHE                                      | 1                  | 15 to 20minutes telephone session with a study therapist | Psychologist             | 15 - 14      | 40 (14.6)              | 80             | 8.1 (10.9)                       |
|                       |                                  |              |                             |                       |                         |                                                                                 |                        |                                          |                    |                                                          |                          |              |                        |                |                                  |
| Arnedt et al. 2021    | ICSD-3                           | 65 - 65      | Excluded                    | Partially excluded    | No restriction          | ISI, SOL_diary, WASO_diary, SE_diary, TST_diary, Rem, Res, Comp                 | Telehealth             | SHE, SR, SK, Cog_control, R              | 6                  | 30 to 60 minutes                                         | Sleep Medicine Expert    | 33 - 33      | 43.7 (17.4)            | 69.7           | NA                               |
|                       |                                  |              |                             |                       |                         |                                                                                 | F2F                    | SHE, SR, SK, Cog_control, R              | 6                  | 30 to 60 minutes                                         | Sleep Medicine Expert    | 32 - 32      | 50.9 (14.5)            | 71.9           | NA                               |
| Ballesio et al. 2018  | DSM-5                            | 10 - 10      | Not reported                | Not reported          | Not reported            | ISI, SOL_diary, SE_diary, Comp                                                  | F2F                    | SHE, SR, SK, Cog_restruct, R             | 4                  |                                                          | Psychologist             | 6 - 6        | 22.8 (4.29)x           | 90x            | NA                               |
|                       |                                  |              |                             |                       |                         |                                                                                 | Unguided bibliotherapy | SHE, SR, SK, Cog_restruct, R             |                    |                                                          |                          | 4 - 4        | 22.8 (4.29)x           | 90x            | NA                               |
| Bastien et al. 2004   | DSM-IV and ICSD                  | 45 - 45      | Excluded                    | Partially excluded    | Not allowed             | ISI, SOL_diary, WASO_diary, TST_diary, SE_diary, SQ_diary, Rem, Comp            | Group                  | SHE, SR, SK, Cog_restruct                | 8                  | 90 minutes (4 – 6 persons per group)                     | Psychologist             | 16 - 16      | 40 (10.35)             | 68.75x         | 15.35 (14.13)                    |
|                       |                                  |              |                             |                       |                         |                                                                                 | F2F                    | SHE, SR, SK, Cog_restruct                | 8                  | 50 minutes                                               | Psychologist             | 15 - 15      | 43.8 (9.98)            | 73.33x         | 15.64 (11.73)                    |
|                       |                                  |              |                             |                       |                         |                                                                                 | Guided bibliotherapy   | SHE, SR, SK, Cog_restruct                | 8                  | 20 minutes                                               | Psychologist             | 14 - 14      | 41.64 (9.49)           | 50x            | 14.71 (10.2)                     |
| Blom et al. 2015      | DSM-5                            | 48 - 45*     | Excluded                    | Partially excluded    | No restriction          | ISI, SOL_diary, TST_diary, SE_diary, SQ-diary, Rem, Res, Comp                   | Group                  | SHE, SR, SK, Cog_restruct, R             | 8                  | 120 minutes                                              | Psychologist             | 24 - 23*     | 52.6 (16.6)            | 62.5           | NA                               |
|                       |                                  |              |                             |                       |                         |                                                                                 | Guided iCBT-I          | SHE, SR, SK, Cog_restruct, R             | 8                  |                                                          | Psychologist             | 24 - 22*     | 56.1 (10.2)            | 33             | NA                               |
| Bothelius et al. 2013 | RDC                              | 66 - 54      | Excluded                    | Partially excluded    | No restriction          | ISI, SOL_diary, WASO_diary, Rem, Comp                                           | Group                  | SHE, SR, SK, Cog_restruct, Cog_PI, R_PMR | 5                  | 60 to 90 minutes                                         | Nurse                    | 32* - 26     | 48.1 (13.2)            | 78             | NA                               |
|                       |                                  |              |                             |                       |                         |                                                                                 | WL                     |                                          |                    |                                                          |                          | 34* - 28     | 53 (9.4)               | 94             | NA                               |

|                     |                   |            |                    |                    |                |                                                                                                      |                 |                                                             |   |                                                                  |                   |                           |              |        |             |
|---------------------|-------------------|------------|--------------------|--------------------|----------------|------------------------------------------------------------------------------------------------------|-----------------|-------------------------------------------------------------|---|------------------------------------------------------------------|-------------------|---------------------------|--------------|--------|-------------|
| Cheng et al. 2019   | DSM-5             | 1385 - 658 | Excluded           | Partially excluded | Not reported   | ISI, Rem, Res                                                                                        | Unguided iCBT-I | SHE, SR, SK, Cog_Restruct, Cog_PI, R_PMR, R_auto, R_mindful | 6 |                                                                  | Virtual therapist | 946 - 358                 | 44.5 (15.8)  | 78     | NA          |
| Drake et al. 2019   | DSM-5             | 154 - 150  | Excluded           | Partially excluded | Not allowed    | ISI, SOL_diary, WASO_diary, SE_diary, TST_diary, SQ_diary, Rem, Comp                                 | SHE             | SHE                                                         | 6 |                                                                  | None              | 439 - 300                 | 45.7 (15.1)  | 80     | NA          |
|                     |                   |            |                    |                    |                |                                                                                                      | F2F             | SHE, SR, SK, Cog_Restruct, Cog_PI, R_PMR, R_auto            | 6 |                                                                  | Nurse             | 52 - 50                   | 55.32 (5.9)  | 100    | NA          |
| Edinger et al. 2001 | DSM-III           | 75 - 70    | Partially excluded | Partially excluded | Not allowed    | ISQ, SOL_diary, WASO_diary, SE_diary, TST_diary, SQ_diary, Res, Comp                                 | SHE             | SHE                                                         | 6 | 30 to 60 minutes                                                 | Nurse             | 50 - 50                   | 57.24 (5.55) | 100    | NA          |
|                     |                   |            |                    |                    |                |                                                                                                      | F2F             | SHE, SR, SK, Cog_Restruct                                   | 6 |                                                                  | Psychologist      | 25 - 23                   | 55.8 (12.1)  | 44     | 13 (12.2)   |
| Edinger et al. 2007 | DSM-IV            | 35* - 30*  | Excluded           | Partially excluded | Not allowed    | ISQ, SOL_diary, WASO_diary, SE_diary, TST_diary, Rem, Res, Comp                                      | Placebo         | Placebo                                                     | 6 | 30 to 60 minutes                                                 | Psychologist      | 25 - 24                   | 55.7 (9.5)   | 52     | 14.8 (11.5) |
|                     |                   |            |                    |                    |                |                                                                                                      | F2F             | SHE, SR, SK, Cog_Restruct                                   | 4 | 45 to 60 minutes (first session), 15-30 minutes (other sessions) | Psychologist      | 24* - 21*                 | 57 (10.2)    | 50     | NA          |
| Edinger et al. 2009 | DSM-IV and RDC    | 81* - 69*  | Partially excluded | Partially excluded | No restriction | ISQ, PSQI, SOL_diary, WASO_diary, SE_diary, TST_diary, SOL_act, WASO_act, SE_act, TST_act, Rem, Comp | ActCon          | Active control                                              | 4 | 30 to 60 minutes                                                 | Psychologist      | 11* - 9                   | 52.4 (7.3)   | 36.36  | NA          |
|                     |                   |            |                    |                    |                |                                                                                                      | F2F             | SHE, SR, SK, Cog_Restruct                                   | 4 |                                                                  | Psychologist      | 41* - 36*                 | 54.39 (NA)   | 14.63  | 11.51 (NA)  |
| Espie et al. 2001   | ICSD              | 139 - 139  | Partially excluded | Partially excluded | No restriction | SOL_diary, WASO_diary, TST_diary, Comp                                                               | SHE             | SHE                                                         | 4 | 30 to 60 minutes                                                 | Psychologist      | 40* - 33*                 | 54 (NA)      | 12.5   | 9 (NA)      |
|                     |                   |            |                    |                    |                |                                                                                                      | Group           | SHE, SK, SR, R, Cog_restruct                                | 6 | 50 minutes                                                       | Nurse             | 74only post reported - 74 | 51.4 (17.1)x | 68.34x | NA          |
|                     |                   |            |                    |                    |                |                                                                                                      | ActCon          | Active control                                              |   |                                                                  |                   | 65only post reported - 65 | 51.4 (17.1)x | 68.34x | NA          |
| Espie et al. 2007   | DSM-IV and ICSD-R | 201 - 178  | Partially excluded | Partially excluded | No restriction | PSQI, SOL_diary, WASO_diary, SE_diary, TST_diary, SOL_act, WASO_act, SE_act, Rem, Comp               | Group           | SHE, SR, SK, R, Cog_restruct                                | 5 | 60 minutes                                                       | Nurses            | 107 - 95                  | 54.4 (15.4)  | 67.29  | 11.6 (9.79) |
| Espie et al. 2012   | DSM-5             | 164 - 131  | Excluded           | Excluded           | No restriction | SCI, SOL_diary, WASO_diary, SE_diary, TST_diary, SQ_diary, Rem, Comp                                 | TAU             | TAU                                                         | 6 |                                                                  | Virtual therapist | 94 - 83                   | 54.1 (14.4)  | 69.15  | 10.6 (12.2) |
|                     |                   |            |                    |                    |                |                                                                                                      | Unguided iCBT-I | SHE, SR, SK, Cog_Restruct, Cog_PI, R_PMR, R_auto, R_mindful | 6 |                                                                  | Virtual therapist | 55 - 43                   | 50.7 (13.8)  | 72.7   | NA          |
|                     |                   |            |                    |                    |                |                                                                                                      | Placebo         | Placebo                                                     | 6 |                                                                  | Virtual therapist | 55 - 41                   | 47.3 (13)    | 76.4   | NA          |
|                     |                   |            |                    |                    |                |                                                                                                      | WL              |                                                             |   |                                                                  | Virtual therapist | 55 - 47                   | 49.1 (13.7)  | 70.4   | NA          |

|                              |                                                                                                                                                                                                 |             |                    |                    |                       |                                                                            |                     |                                                             |        |             |                         |                               |                                           |                |                              |
|------------------------------|-------------------------------------------------------------------------------------------------------------------------------------------------------------------------------------------------|-------------|--------------------|--------------------|-----------------------|----------------------------------------------------------------------------|---------------------|-------------------------------------------------------------|--------|-------------|-------------------------|-------------------------------|-------------------------------------------|----------------|------------------------------|
| Espie et al. 2019            | DSM-5                                                                                                                                                                                           | 1711 - 985  | Excluded           | Partially excluded | No restriction        | SCI, SOL_diary, WASO_diary, SE_diary, TST_diary, SQ_diary, Comp            | Unguided iCBT-I     | SHE, SR, SK, Cog_restruct, Cog_PI, R_PMR, R_auto, R_mindful | 6      |             | Virtual therapist       | 853 - 468                     | 48.4 (13.9)                               | 76.7           | NA                           |
| Freeman et al. 2017          | SCI ≤16                                                                                                                                                                                         | 3755 - 1875 | Not reported       | No restriction     | Not reported          | SCI, Rem, Comp                                                             | Unguided iCBT-I     | SHE, SR, SK, Cog_restruct, Cog_PI, R_PMR, R_auto, R_mindful | 6      |             | Virtual therapist       | 858 - 517<br>1891 - 733       | 47.7 (13.6)<br>24.8 (7.7)                 | 78.7<br>72     | NA<br>NA                     |
| Gehrman et al. 2021          | DSM-5                                                                                                                                                                                           | 60 - 54     | Excluded           | Partially excluded | Not allowed           | ISI, Comp                                                                  | TAU<br>F2F          | SHE, SR, SK, Cog, R                                         | 6 to 8 |             | Psychologist / Students | 1864 - 1142<br>20 - 24        | 24.6 (7.6)<br>33.7 (10.58)                | 71<br>65       | NA<br>NA                     |
| Gieselmann & Pietrowsky 2019 | DSM-5                                                                                                                                                                                           | 72 - 66     | Excluded           | Partially excluded | Required to be stable | PSQI, SOL_diary, SE_diary, TST_diary, SOL_act, SE_act, TST_act, Rem, Comp  | WL<br>F2F           | SHE, SR, SK, Cog, R                                         | 3      |             | Psychologist / students | 21 - 26<br>19 - 17<br>27 - 24 | 33.14 (10)<br>31.21 (8.7)<br>39.3 (14.47) | 62<br>68<br>48 | NA<br>MA<br>9.16 (10.17)     |
| Hagatun et al. 2018          | DSM-IV                                                                                                                                                                                          | 181 - 142   | Partially excluded | Partially excluded | No restriction        | ISI, SOL_diary, WASO_diary, SE_diary, TST_diary, Rem, Comp                 | Telehealth<br>WL    | SHE, SR, SK, Cog, R                                         | 3      |             | Psychologist / students | 23 - 23                       | 39.47 (11.16)                             | 56             | 7.12 (5.61)                  |
| Ho et al. 2014               | difficulty initiating or maintaining sleep, early morning awakening or non-restorative sleep with associated distress or impairment for three or more nights per week for at least three months | 312 - 184   | Not reported       | Partially excluded | Not reported          | ISI, PSQI, SOL_diary, WASO_diary, SE_diary, TST_diary, SQ_diary, Rem, Comp | Unguided iCBT-I     | SHE, SR, SK, Cog_restruct, Cog_control, R                   | 6      |             |                         | 86 - 65<br>104 - 61*          | 44.8 (13.7)<br>38.6 (11.8)                | 71<br>67.31    | categorical scale<br>8 (8.9) |
| Ho et al. 2021               | DSM-5 and SCI                                                                                                                                                                                   | 25 - 15     | Not reported       | Partially excluded | Not allowed           | ISI, Rem                                                                   | Guided iCBT-I<br>WL | SHE, SR, SK, Cog_restruct, Cog_control, R                   | 6      | 120 minutes | Psychologist            | 103 - 58<br>105 - 65          | 36.9 (13)<br>39.9 (12.7)                  | 70.87<br>75.24 | 8 (7.8)<br>9.4 (8.9)         |
| Holmqvist et al. 2014        | RDC                                                                                                                                                                                             | 73 - 54     | Partially excluded | Partially excluded | No restriction        | ISI, SOL_diary, WASO_diary, SE_diary, TST_diary, SQ_diary, Rem, Res        | Group<br>WL         | SHE, SR, SK, Cog_Restruct, Cog_control, R_PMR               | 6      |             | Psychologist / Students | 13 - 7                        | 43.1 (14.3)                               | 84.62          | 15 (12.9)                    |
|                              |                                                                                                                                                                                                 |             |                    |                    |                       |                                                                            | WL                  |                                                             |        |             |                         | 13 - 8                        | 36.6 (11.7)<br>NA (NA)                    | 69.23<br>79.4  | 12.7 (12.5)<br>NA            |
|                              |                                                                                                                                                                                                 |             |                    |                    |                       |                                                                            | Telehealth          | SHE, SR, SK, Cog_problem, R_PMR, R_image                    | 6      |             | Sleep medicine experts  | 34 - 28                       |                                           |                |                              |
|                              |                                                                                                                                                                                                 |             |                    |                    |                       |                                                                            | Unguided iCBT-I     | SHE, SR, SK, Cog_control, Cog_problem, R_PMR, R_image       | 6      |             |                         | 39 - 26                       | NA (NA)                                   | 71.8           | NA                           |

|                       |                    |            |                    |                    |                |                                                                           |                           |                                                             |        |                  |                         |            |                             |       |             |
|-----------------------|--------------------|------------|--------------------|--------------------|----------------|---------------------------------------------------------------------------|---------------------------|-------------------------------------------------------------|--------|------------------|-------------------------|------------|-----------------------------|-------|-------------|
| Irwin et al. 2014     | DSM-IV and ICDSD-2 | 75 - 72    | Partially excluded | Partially excluded | Not allowed    | AIS, PSQI, SOL_diary, WASO_diary, SE_diary, TST_diary                     | Group                     | SHE, SR, SK, Cog, R                                         | 16     | 120 minutes      | Therapists              | 50 - 48    | 66.4 (6.1)                  | 78    | NA          |
| Jernelov et al. 2012  | RDC                | 133 - 126* | Partially excluded | Partially excluded | No restriction | ISI, SOL_diary, WASO_diary, SE_diary, TST_diary, SQ_diary, Rem, Res, Comp | SHE                       | SHE                                                         | 16     | 120 minutes      | Therapists              | 25 - 24    | 66.4 (7.7)                  | 72    | NA          |
|                       |                    |            |                    |                    |                |                                                                           | Guided bibliotherapy      | SHE, SR, SK, Cog_Restruct, R                                | 6      |                  | Psychologist            | 44 - 43    | 50.8 (11.8)                 | 75    | 18.2 (3.5)  |
|                       |                    |            |                    |                    |                |                                                                           | Unguided bibliotherapy WL | SHE, SR, SK, Cog_Restruct, R                                | 6      |                  |                         | 45 - 44    | 47.4 (13.3)                 | 80    | 18.3 (3.3)  |
| Johann et al.2020     | DSM-5              | 46 - 44    | Excluded           | Partially excluded | Not allowed    | ISI, TST_diary, SOL_diary, WASO_diary, SE_diary                           | F2F                       | SHE, SR, Cog_restruct, Cog_control, Cog_Pi, R_PMR, R_Auto   | 8      | 50 minutes       | Psychologist            | 23 - 23    | 45.4 (16)<br>40.8 (14)      | 60.87 | NA          |
|                       |                    |            |                    |                    |                |                                                                           | WL                        |                                                             |        |                  |                         | 23 - 21    | 41.2 (15.1)<br>41.3 (12.5)  | 65.22 | NA          |
| Kallestad et al. 2021 | DSM-5              | 101 - 94*  | Excluded           | Partially          | No restriction | ISI, SOL_diary, WASO_diary, TST_diary, SE_diary, Rem, Comp                | F2F                       | SHE, SR, SK, Cog_Restruct                                   | 3 to 8 |                  | Psychologist            | 52 - 50*   |                             |       | 13 (10.4)   |
| Kaldo et al. 2020     | RDC                | 40 - 37*   | Excluded           | Partially excluded | No restriction | SOL_diary, WASO_diary, TST_diary, SE_diary, SQ_diary, ISI, Rem, Res, Comp | Unguided iCBT-I           | SHE, SR, SK, Cog_Restruct                                   | 6      | 45 to 60 minutes |                         | 49 - 44*   | 41.4 (10.5)                 |       | 12.6 (11.5) |
|                       |                    |            |                    |                    |                |                                                                           | Group                     | SHE, SR, SK, Cog, Cog_Restruct, R, R_mindful                | 6      | 45 to 85 minutes | Psychologist / Students | 20 - 18*   | 52.2 (10.7)                 | 65    | 17.2 (12.9) |
| Krieger et al. 2019   | ICSD-3             | 104 - 91   | Excluded           | Partially excluded | No restriction | ISI, PSQI, Rem, Res, Comp                                                 | WL                        |                                                             |        |                  |                         | 20 - 15*   | 57.9 (10.8)<br>42.17 (12.4) | 75    | 11.1 (12.3) |
|                       |                    |            |                    |                    |                |                                                                           | Guided iCBT-I             | SHE, SR, SK, Cog_restruct, R_PMR                            | 8      |                  | Psychologist / Students | 42 - 40*   |                             | 61.9  | NA          |
| Kyle et al. 2020      | DSM-5              | 410 - 336  | Excluded           | Partially excluded | Not allowed    | ISI, SE_PSQI, Comp                                                        | WL                        |                                                             |        |                  |                         | 21 - 20    | 45.24 (12.4)<br>52.5 (11.2) | 81    | NA          |
|                       |                    |            |                    |                    |                |                                                                           | Unguided iCBT-I           | SHE, SR, SK, Cog_restruct, Cog_Pi, R_PMR, R_auto, R_mindful | 6      | 15 to 20 minutes | Virtual Therapist       | 205 - 155  |                             | 85.4  | NA          |
| Lancee et al. 2012    | DSM-IV             | 623 - 531  | Partially excluded | Partially excluded | No restriction | SLEEP-50; SE_diary, TST_diary, SOL_diary, WASO_diary, Rem, Comp           | WL                        |                                                             |        |                  |                         | 205 - 181  | 52.2 (11.7)<br>51.2 (12.8)  | 87.7  | NA          |
|                       |                    |            |                    |                    |                |                                                                           | Unguided bibliotherapy    | SHE, SR, SK, Cog_Restruct, Cog_Pi, R_PMR, R_Auto            | 6      |                  |                         | 203 - 179* |                             | 74.4  | NA          |
|                       |                    |            |                    |                    |                |                                                                           | Guided iCBT-I             | SHE, SR, SK, Cog_Restruct, Cog_Pi, R_PMR, R_Auto            | 6      |                  |                         | 216 - 166* | 52.2 (11.4)                 | 68.7  | NA          |
|                       |                    |            |                    |                    |                |                                                                           | WL                        |                                                             |        |                  |                         | 200 - 184* | 51.9 (12.2)                 | 68    | NA          |

|                       |                                                                                                          |           |                    |                    |                       |                                                                                                |                        |                                                     |   |            |                            |           |               |       |               |
|-----------------------|----------------------------------------------------------------------------------------------------------|-----------|--------------------|--------------------|-----------------------|------------------------------------------------------------------------------------------------|------------------------|-----------------------------------------------------|---|------------|----------------------------|-----------|---------------|-------|---------------|
| Lancee et al. 2015    | DSM-5                                                                                                    | 63 - 54*  | Partially excluded | Partially excluded | No restriction        | SE_diary, TST_diary, SOL_diary, WASO_diary, SQ_diary, ISI, Rem, Res, Comp                      | Guided iCBT-I          | SHE, SR, SK, Cog_Restruct, Cog_PI, R_PMR, R_Auto    | 6 |            | Psychologist / Students    | 36 - 25   | 47.47 (14.37) | 83.3  | NA            |
|                       |                                                                                                          |           |                    |                    |                       |                                                                                                | WL                     |                                                     |   |            |                            | 27 - 18   | 49.98 (13.71) | 74.1  | NA            |
| Lancee et al. 2016    | DSM-5                                                                                                    | 90 - 81*  | Partially excluded | Partially excluded | No restriction        | SOL_diary, WASO_diary, TST_diary, SQ_diary, ISI, Rem, Res, Comp                                | F2F                    | SHE, SR, SK, Cog_restruct, R_PMR                    | 6 | 45 minutes | Specialized Psychologist   | 30 - 29*  | 38.5 (13.1)   | 73.3  | NA            |
|                       |                                                                                                          |           |                    |                    |                       |                                                                                                | Guided iCBT-I          | SHE, SR, SK, Cog_restruct, R_PMR                    | 6 |            | Psychologist / Students    | 30 - 26*  | 41.2 (14.1)   | 86.7  | NA            |
|                       |                                                                                                          |           |                    |                    |                       |                                                                                                | WL                     |                                                     |   |            |                            | 30 - 26*  | 45.1 (13.7)   | 83.3  | NA            |
| Lopez et al. 2019     | DSM-5                                                                                                    | 46 - 38   | Excluded           | Excluded           | No restriction        | TST_diary, SE_diary, SOL_diary, WASO_diary, ISI, Comp                                          | Unguided iCBT-I        | SHE, SR, SK, Cog_Restruct, R_Auto, R_mindful, R_PMR | 7 |            |                            | 23 - 18   | 46 (11)       | 82.61 | 11 (15)       |
|                       |                                                                                                          | 46 -      |                    |                    |                       |                                                                                                | SHE                    | SHE                                                 | 1 | 60 minutes |                            | 23 - 20   | 45 (13)       | 65.22 | 11 (14)       |
| Lorenz et al. 2019    | DSM-5                                                                                                    | 56 - 52   | Excluded           | Partially excluded | Required to be stable | ISI, Rem, Comp                                                                                 | Unguided iCBT-I        | SHE, SR, SK, R_PMR, Cog_Restruct                    | 6 |            | Virtual therapist          | 29 - 25   | 41.72 (17.31) | 72    | NA            |
|                       |                                                                                                          |           |                    |                    |                       |                                                                                                | WL                     |                                                     |   |            |                            | 27 - 27   | 44.04 (20.05) | 67    | NA            |
| Lovato et al. 2014    | (1) WASO ≥30 min, at least three nights per week for at least 6 months, (2) impaired daytime functioning | 118 - 109 | Excluded           | Partially excluded | Not allowed           | SE_diary, SOL_diary, TST_diary, WASO_act, TST_act, SE_act, ISI, Rem, Comp                      | Group                  | SHE, SR, Cog_Restruct                               | 4 | 60 minutes | Psychologist               | 86 - 78   | 63.76 (6.45)x | 50x   | NA            |
|                       |                                                                                                          |           |                    |                    |                       |                                                                                                | WL                     |                                                     |   |            |                            | 32 - 31   | 63.76 (6.45)x | 50x   | NA            |
| Lovato et al. 2016    | (1) WASO ≥30 min, at least three nights per week for at least 6 months, (2) impaired daytime functioning | 91 - 82   | Excluded           | Partially excluded | Not allowed           | ISI, SOL_diary, WASO_diary, SE_diary, TST_diary, SE_act, SOL_act, WASO_act, TST_act, Rem, Comp | roup                   | SHE, SR, Cog_Restruct                               | 4 | 60 minutes | Therapists / Psychologists | 63 - 57   | 62.94 (6.45)  | 50    | NA            |
|                       |                                                                                                          |           |                    |                    |                       |                                                                                                | WL                     |                                                     |   |            |                            | 28 - 26   | 63.34 (6.41)  | 56.41 | NA            |
| Majd et al. 2020      | DSM-5                                                                                                    | 312 - 295 | Partially excluded | Partially excluded | Not reported          | ISI, PSQI, Comp                                                                                | Smartphone             | SHE, SR, Cog_Restruct, Cog_probelm, R_image         | 6 |            |                            | 156 - 147 | 36.21 (5.81)  | 53.9  | 1.3 (NA)      |
|                       |                                                                                                          |           |                    |                    |                       |                                                                                                | SHE                    | SHE                                                 |   |            |                            | 156 - 148 | 35.29 (5.76)  | 57.7  | 1.3 (NA)      |
| Mimeault & Morin 1999 | ICSD and DSM-IV                                                                                          | 58 - 54   | Excluded           | Partially excluded | No restriction        | ISI, SOL_diary, WASO_diary, SE_diary, TST_diary, SQ_diary, PSQI, Rem, Comp                     | Guided bibliotherapy   | SHE, SK, SR, Cog_Restruct                           | 6 |            | Therapist                  | 18 - 18   | 45.61 (8.49)  | 61.11 | 12.43 (10.22) |
|                       |                                                                                                          |           |                    |                    |                       |                                                                                                | ActCon                 | Active control                                      |   |            |                            | 18 - 18   | 59.94 (13.43) | 61.11 | 12.86 (8.98)  |
|                       |                                                                                                          |           |                    |                    |                       |                                                                                                | Unguided bibliotherapy | SHE, SK, SR, Cog_Restruct                           | 6 |            |                            | 18 - 18   | 49.83 (13.26) | 55.56 | 17.13 (11.09) |

|                        |                 |            |                    |                    |                       |                                                                                                           |                 |                                                                |   |             |              |            |               |       |              |
|------------------------|-----------------|------------|--------------------|--------------------|-----------------------|-----------------------------------------------------------------------------------------------------------|-----------------|----------------------------------------------------------------|---|-------------|--------------|------------|---------------|-------|--------------|
| Morin et al. 1993      | ICSD            | 24 - 24    | Partially excluded | Partially excluded | No restriction        | SOL_diary, WASO_diary, TST_diary, SE_diary, SOL_psg, WASO_psg, TST_psg, SE_psg, Comp                      | Group           | SHE, SR, SK, Cog_Restruct                                      | 8 | 90 minutes  | Psychologist | 12 - 12    | 67.1 (5.3)x   | 70.8x | NA           |
| Ritterband et al. 2009 | DSM-IV          | 45 - 43*   | Excluded           | Partially excluded | Required to be stable | ISI, SOL_diary, WASO_diary, SE_diary, Rem, Comp                                                           | ActCon          | Active control                                                 | 6 |             |              | 10 - 10    | 67.1 (5.3)x   | 70.8x | NA           |
|                        |                 |            |                    |                    |                       |                                                                                                           | Unguided iCBT-I | SHE, SR, SK, Cog_Restruct                                      |   |             |              | 22 - 21    | 44.68 (10.61) | 81.82 | 10.14 (8.26) |
| Ritterband et al. 2017 | DSM-5           | 303 - 275* | Excluded           | Partially excluded | Required to be stable | ISI, SOL_diary, WASO_diary, SE_diary, TST_diary, SQ_diary, Rem, Comp                                      | WL              |                                                                | 6 |             |              | 22 - 22    | 45.05 (11.67) | 72.73 | 11.04 (8.89) |
|                        |                 |            |                    |                    |                       |                                                                                                           | Unguided iCBT-I | SHE, SR, SK, Cog_Restruct                                      |   |             |              | 151 - 133* | 43.75 (11.34) | 68.2  | 15 (NA)      |
| Sandlund et al. 2017   | DSM-IV          | 165 - 132  | Excluded           | Partially excluded | No restriction        | ISI, SOL_diary, SE_diary, WASO_diary, TST_diary, SQ_diary, Rem, Res, Comp                                 | Group           | SHE, SK, SR, Cog_Restruct, Cog_PI, Cog_Control, Cog_problem, R | 7 | 120 minutes | Nurses       | 152 - 142* | 42.81 (11.86) | 75.7  | 7 (NA)       |
|                        |                 |            |                    |                    |                       |                                                                                                           | WL              |                                                                |   |             |              | 82 - 72    | 55 (17.1)     | 71.1  | 12 (NA)      |
| Sato et al. 2019       | DSM-5           | 23 - 22    | Not reported       | Partially excluded | No restriction        | SOL_PSQI, SE_PSQI, TST_PSQI, PSQI, Rem, Comp                                                              | Guided iCBT-I   | SHE, SK, SR, Cog_restruct, R, R_PMR                            | 5 |             | Therapist    | 71 - 60    | 54 (17.4)     | 74.7  | 13 (NA)      |
|                        |                 |            |                    |                    |                       |                                                                                                           | SHE             | SHE                                                            |   |             |              | 11 - 11    | 49.4 (13.8)   | 81.3  | 6.3 (5.1)    |
| Ström et al. 2004      | DSM-IV and ICSD | 109 - 83*  | Excluded           | Partially excluded | No restriction        | SOL_diary, SE_diary, SQ_diary, Comp                                                                       | Guided iCBT-I   | SHE, SR, SK, Cog_Restruct, R                                   | 5 |             | Psychologist | 12 - 12    | 50.5 (8.8)    | 75    | 6 (7.7)      |
|                        |                 |            |                    |                    |                       |                                                                                                           | WL              |                                                                |   |             |              | 54 - 32*   | 46.2 (11.6)   | 66.67 | 12.9 (8.6)   |
| Taylor et al. 2014     | DSM-5           | 34 - 29    | Excluded           | Partially excluded | Not allowed           | ISI, SE_diary, TST_diary, SOL_diary, WASO_diary, SQ_diary, PSQI, SE_act, TST_act, SOL_act, WASO_act, Comp | F2F             | SHE, SR, SK, Cog_Restruct, R_PMR, R_auto                       | 6 |             |              | 55 - 51    | 43.9 (11.4)   | 62.75 | 9 (7.8)      |
|                        |                 |            |                    |                    |                       |                                                                                                           |                 |                                                                |   |             |              | 17 - 16    | 19.47 (1.66)  | 23.5  | NA           |
| Taylor et al. 2017     | DSM-5           | 100 - 86   | Partially excluded | Partially excluded | Required to be stable | ISI, SE_diary, TST_diary, SOL_diary, WASO_diary, SQ_diary, Comp                                           | WL              |                                                                | 6 |             | None         | 17 - 13    | 19.94 (2.49)  | 58.8  | NA           |
|                        |                 |            |                    |                    |                       |                                                                                                           | F2F             | SHE, SR, SK, Cog_Restruct, R                                   |   |             |              | 34 - 27    | 34.53 (8.27)  | 18    | NA           |



|                             |        |            |                    |                    |                       |                                                                                                      |                 |                                                    |                    |                   |                                         |         |              |      |             |
|-----------------------------|--------|------------|--------------------|--------------------|-----------------------|------------------------------------------------------------------------------------------------------|-----------------|----------------------------------------------------|--------------------|-------------------|-----------------------------------------|---------|--------------|------|-------------|
| Taylor et al. 2018          | DSM-5  | 151 - 133  | Partially excluded | Partially excluded | Required to be stable | ISI, SE_diary, TST_diary, SOL_diary, WASO_diary, SQ_diary, SE_act, TST_act, SOL_act, WASO_act , Comp | Unguided iCBT-I | SHE, SR, SK, Cog_Restruct, R                       | 6                  | 60 minutes        | Psychologist / Students / Social worker | 33 - 30 | 30.79 (6.42) | 21   | NA          |
|                             |        |            |                    |                    |                       |                                                                                                      | ActCon          | Active control                                     | in call every week |                   |                                         | 33 - 29 | 32.82 (8.11) | 12   | NA          |
| van der Zweerde et al. 2020 | DSM-5  | 134 - 105* | Partially excluded | Partially excluded | No restriction        | ISI, SOL_diary, SE_diary, WASO_diary, TST_diary, SQ_diary, Rem, Res, Comp                            | F2F             | SHE, SR, SK, Cog_Restruct, R                       | 6                  | 60 minutes        | Psychologist / Students / Social worker | 42 - 30 | 32.21 (7.18) | 18   | NA          |
|                             |        |            |                    |                    |                       |                                                                                                      | ActCon          | Active control                                     | in call every week |                   |                                         | 43 - 36 | 32.67 (7.97) | 17   | NA          |
| van Straten et al. 2014     | DSM-IV | 118 - 82*  | Not reported       | Partially excluded | No restriction        | SE_diary, TST_diary, SOL_diary, PSQI, Rem, Res, Comp                                                 | Guided iCBT-I   | SHE, SR, SK, Cog_Restruct, R                       | 5                  |                   | Nurses                                  | 69 - 55 | 51.7 (15.77) | 62   | NA          |
|                             |        |            |                    |                    |                       |                                                                                                      | WL              |                                                    |                    |                   |                                         | 65 - 50 | 49.4 (16.01) | 68   | NA          |
| Vincent & Lewycky 2009      | RDC    | 118 - 69   | Excluded           | Partially excluded | No restriction        | ISI, TST_diary, SOL_diary, WASO_diary, SE_diary, SQ_diary, Comp                                      | Guided iCBT-I   | SHE, SR, SK, Cog_restruct, R_PMR                   | 6                  |                   | Psychologist / Students / Therapists    | 59 - 49 | 48.7 (13.8)  | 59.3 | 11.1 (9.6)  |
|                             |        |            |                    |                    |                       |                                                                                                      | WL              |                                                    |                    |                   |                                         | 59 - 53 | 50.1 (11.9)  | 81.4 | 12.6 (10.7) |
| Wong et al. 2021            | DSM-5  | 210 - 159  | Partially excluded | Partially excluded | No restriction        | ISI, Rem, Comp                                                                                       | Unguided iCBT-I | SHE, SR, Cog_restruct, Cog_problem, R_PMR, R_image | 5                  | 240 minutes total | None                                    | 59 - 40 | NA (NA)      | 67.8 | NA          |
|                             |        |            |                    |                    |                       |                                                                                                      | WL              |                                                    |                    |                   |                                         | 59 - 39 | NA (NA)      | 66.1 | NA          |
|                             |        |            |                    |                    |                       |                                                                                                      | Group           | SHE, SR, SK, Cog_restruct, R                       | 4                  |                   |                                         | 70 - 49 | 38.2 (15.8)  | 65.7 | NA          |
|                             |        |            |                    |                    |                       |                                                                                                      | Unguided iCBT-I | SHE, SR, SK, Cog_restruct, R                       |                    |                   |                                         | 70 - 56 | 36.9 (14.7)  | 65.9 | NA          |
|                             |        |            |                    |                    |                       |                                                                                                      | SHE             | SHE                                                |                    |                   |                                         | 70 - 54 | 39.6 (16.3)  | 78.6 | NA          |

Note. DSM= Diagnostic and Statistical Manual of Mental Disorders ; ICSD = International Classification of Sleep Disorders ; RDC = Research Diagnostic Criteria for an Insomnia Disorder

AIS = Athens Insomnia Scale, ISI = Insomnia Severity Index; ISQ= Insomnia Symptom Questionnaire ; SLEEP-50: 8 item insomnia subscale of the SLEEP-50, SCI = Sleep Condition Indication; PSQI = Pittsburg Sleep Quality Index;

TST\_diary = total sleep time measured via sleep diary; SE\_diary = sleep efficiency measured via sleep diary; SOL\_diary = sleep onset latency measured via sleep diary; WASO\_diary = measured via sleep diary

TST\_act = total sleep time measured via actigraphy; SE\_act = sleep efficiency measured via actigraphy; SOL\_act = sleep onset latency measured via actigraphy; WASO\_act = measured via actigraphy

TST\_psg = total sleep time measured via polysomnography; SE\_psg = sleep efficiency measured via polysomnography; SOL\_psg = sleep onset latency measured via polysomnography; WASO\_psg = measured via polysomnography

TST\_PSQI = total sleep time measured via the Pittsburg Sleep Quality Index; SE\_PSQI = sleep efficiency measured via the Pittsburg Sleep Quality Index; SOL\_PSQI = sleep onset latency measured via the Pittsburg Sleep Quality Index; WASO\_PSQI = measured via the Pittsburg Sleep Quality Index

Rem = Remission; Res = Response; Comp = Intervention completion

F2F = Individual Onsite CBT-I; group = group delivered CBT-I; iCBT-I = internet-delivered CBT-I; smartphone = smartphone-delivered CBT-I; SHE = sleep hygiene education; ActCon = active contact control; TAU = treatment as Usual, WL= Waitlist

SHE= sleep hygiene education/psychoeducation; SR = sleep restriction ; SK = stimulus control; Cog = Cognitive therapy; Cog\_restruc = cognitive restructuring; cog\_problem = systematic problem solving; Cog\_control = cognitive control (worry chair), Cog\_PI = paradoxical intention; R = Relaxation; R\_PMR = progressive muscle relaxation; R\_auto =

autogenic training; R\_mindful = mindfulness; R\_image = imagery training \* = if different numbers for different outcome measures are indicated in the study, here the highest is shown

Supplementary Table S3. Network meta-analyses of the secondary outcomes

|                                   | Studies | Participants | Nodes | Comparisons | I <sup>2</sup> | Q <sub>within</sub> designs | Q <sub>between</sub> designs |
|-----------------------------------|---------|--------------|-------|-------------|----------------|-----------------------------|------------------------------|
| Subjective sleep quality          | 31      | 1,876        | 13    | 49          | 62.6%          | 21.88*                      | 55.03**                      |
| Subjective total sleep time       | 38      | 2,256        | 12    | 56          | 0%             | 6.3                         | 22.3                         |
| Subjective sleep efficiency       | 39      | 2,561        | 12    | 59          | 80.8%          | 18.37                       | 175.89**                     |
| Subjective sleep onset latency    | 38      | 2,387        | 12    | 58          | 2.9%           | 14.87                       | 26.45                        |
| Subjective wake after sleep onset | 35      | 2,289        | 12    | 53          | 67.3%          | 26.49*                      | 73.87**                      |
| Objective total sleep time        | 10      | 369          | 8     | 14          | 17%            | 0.01                        | 6.05                         |
| Objective sleep efficiency        | 11      | 457          | 9     | 15          | 15.2%          | 0.22                        | 5.69                         |
| Objective sleep onset latency     | 8       | 341          | 8     | 12          | 0.0%           | 0.00                        | 1.86                         |
| Objective wake after sleep onset  | 9       | 391          | 8     | 11          | 48.1%          | 0.22                        | 5.56                         |
| Response rates                    | 11      | 802          | 9     | 15          | 59.6%          | 9.47*                       | 2.85                         |
| Remission rates                   | 15      | 1,175        | 9     | 19          | 73.5%          | 6.52                        | 27.31**                      |
| Intervention completion rates     | 46      | 6,471        | 13    | 68          | 87.5%          | 220.45**                    | 140.33**                     |

Note. \* p<0.05; \*\* p<0.001

# Supplementary Figure S1. Network plots and forest plots secondary outcomes

## Subjective sleep quality

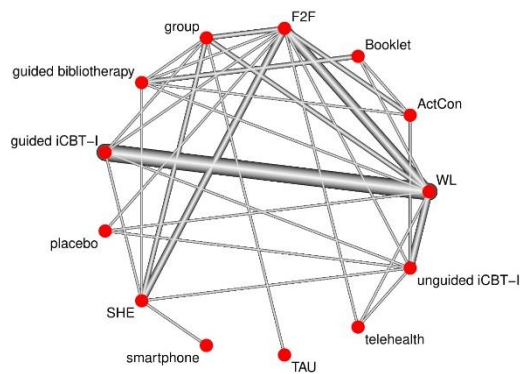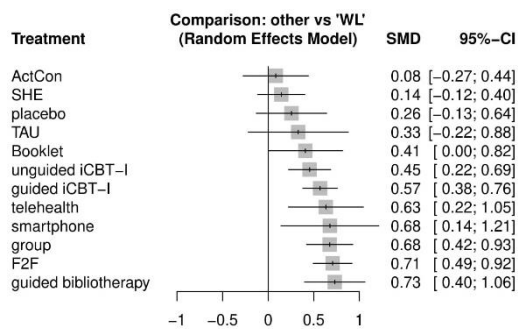

## Subjective total sleep time

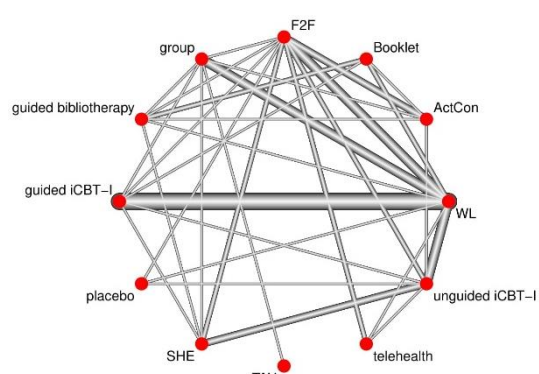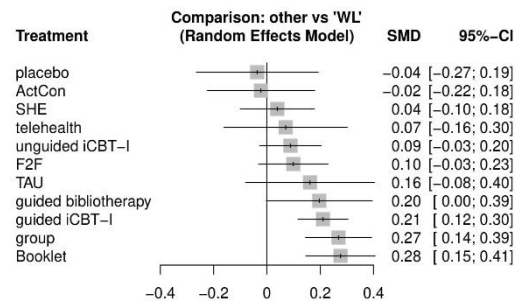

## Subjective sleep efficiency

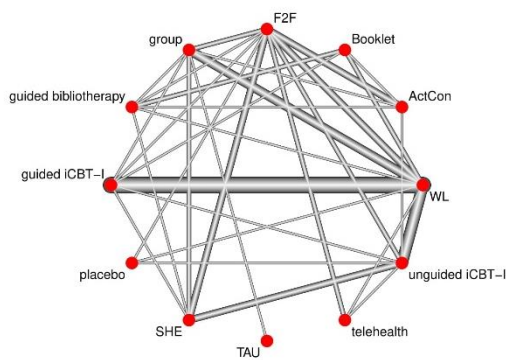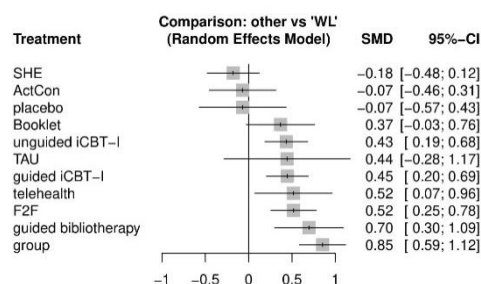

## Subjective sleep onset latency

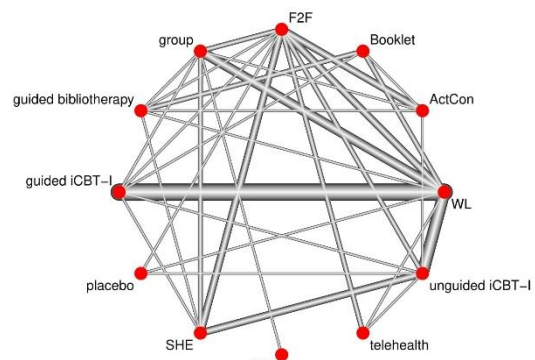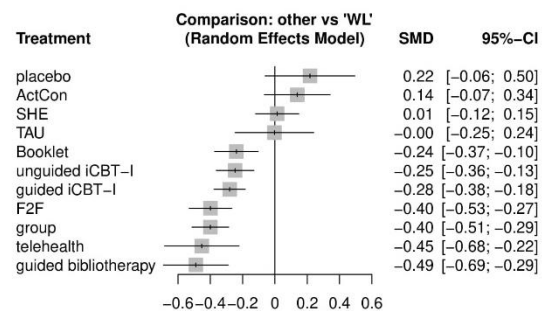

Subjective wake after sleep onset

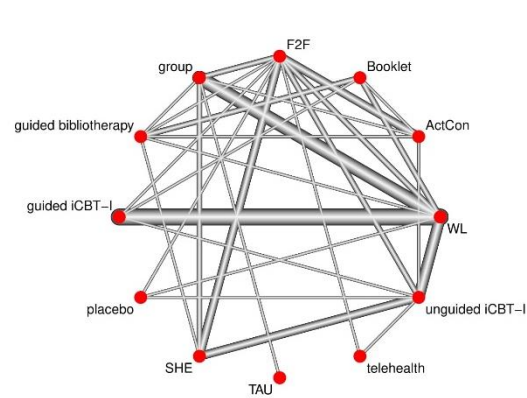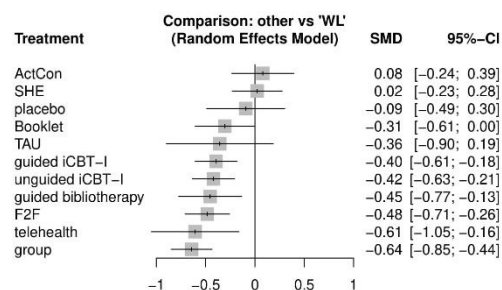

Objective total sleep time

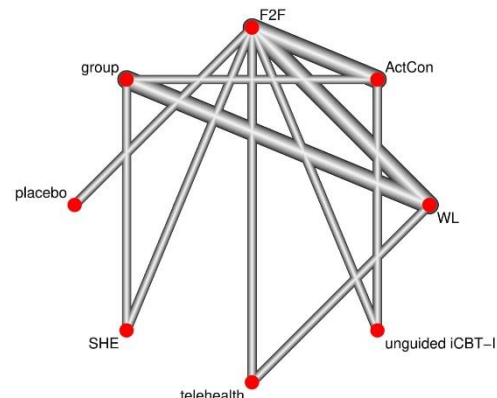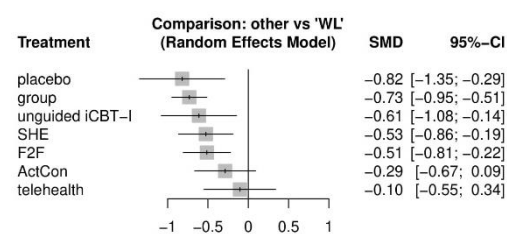

Objective sleep efficiency

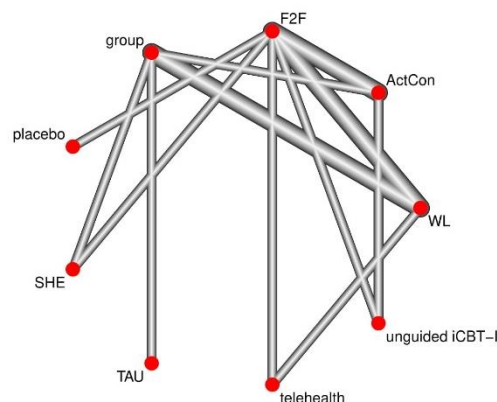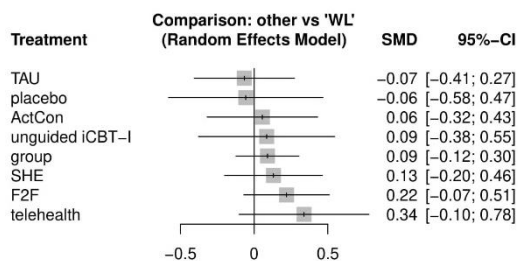

Objective sleep onset latency

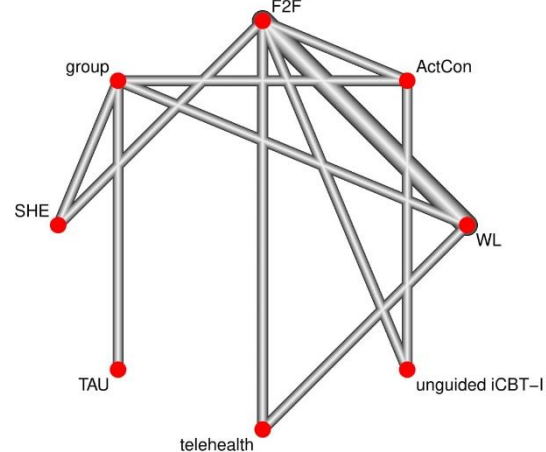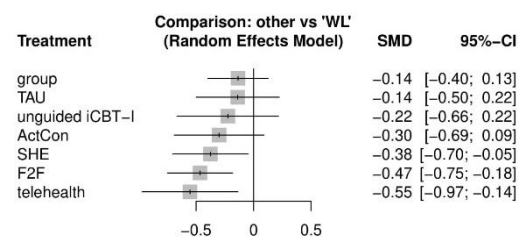

## Objective wake after sleep onset

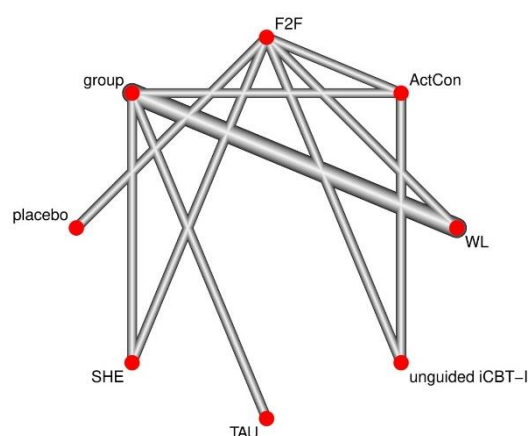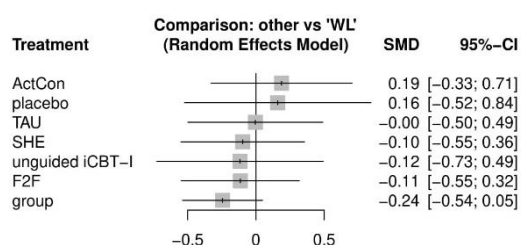

## Response rates

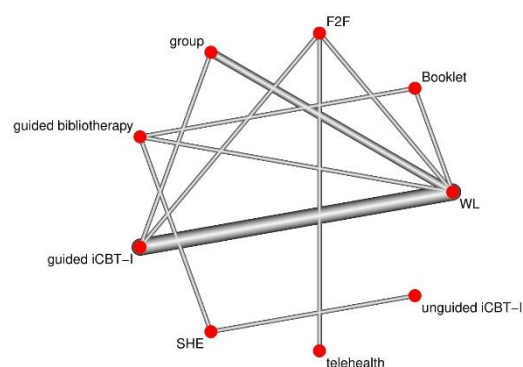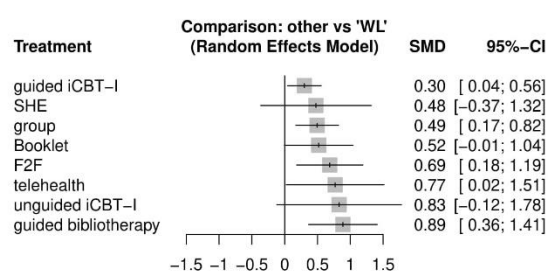

## Remission rates

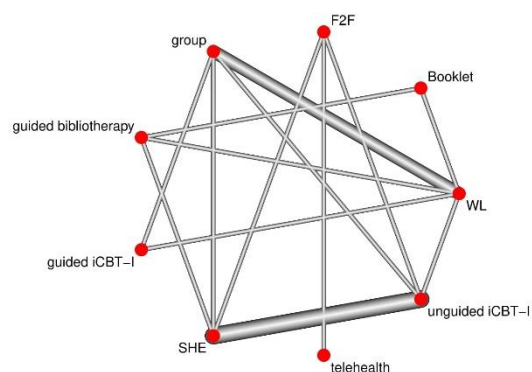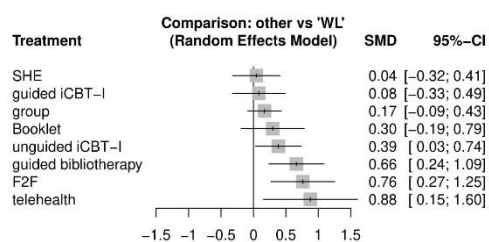

## Intervention completion rates

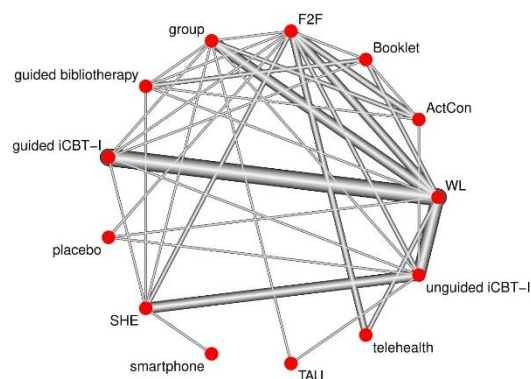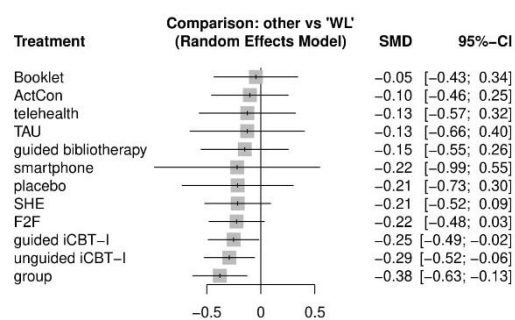

## Supplementary Figure S2. Net heat plots

In the net heat plots, the network estimations of the pairwise comparisons are displayed in the rows, and the contribution of the respective design to the estimation is displayed in the columns. The area of the grey squares is proportional to the contribution of the respective design to the estimation. On the diagonal, red colors indicate that the respective design is responsible for between-design heterogeneity, whereas outside of the diagonal red colors indicates inconsistencies of the estimations of the respective design with other estimates (Schwarzer et al., 2015). Pairwise comparisons corresponding to three-arm designs are designated by “\_”.

The net heat plots were created using the function `netheat()` of the R package `netmeta` (version 2.1; Rücker et al., 2021) in the software R (version 4.2.0; R Core Team, 2021).

*Abbreviations: ActCon = active contact control; Booklet = unguided bibliotherapy; F2F = Individual Onsite CBT-I; group = group delivered CBT-I; guided bib = guided bibliotherapy; guided iCB = guided internet-delivered CBT-I; SHE = sleep hygiene education; smartphone = smartphone-delivered CBT-I; TAU = treatment as Usual; unguided i = unguided internet-delivered CBT-I; WL = waiting list*



## Insomnia severity

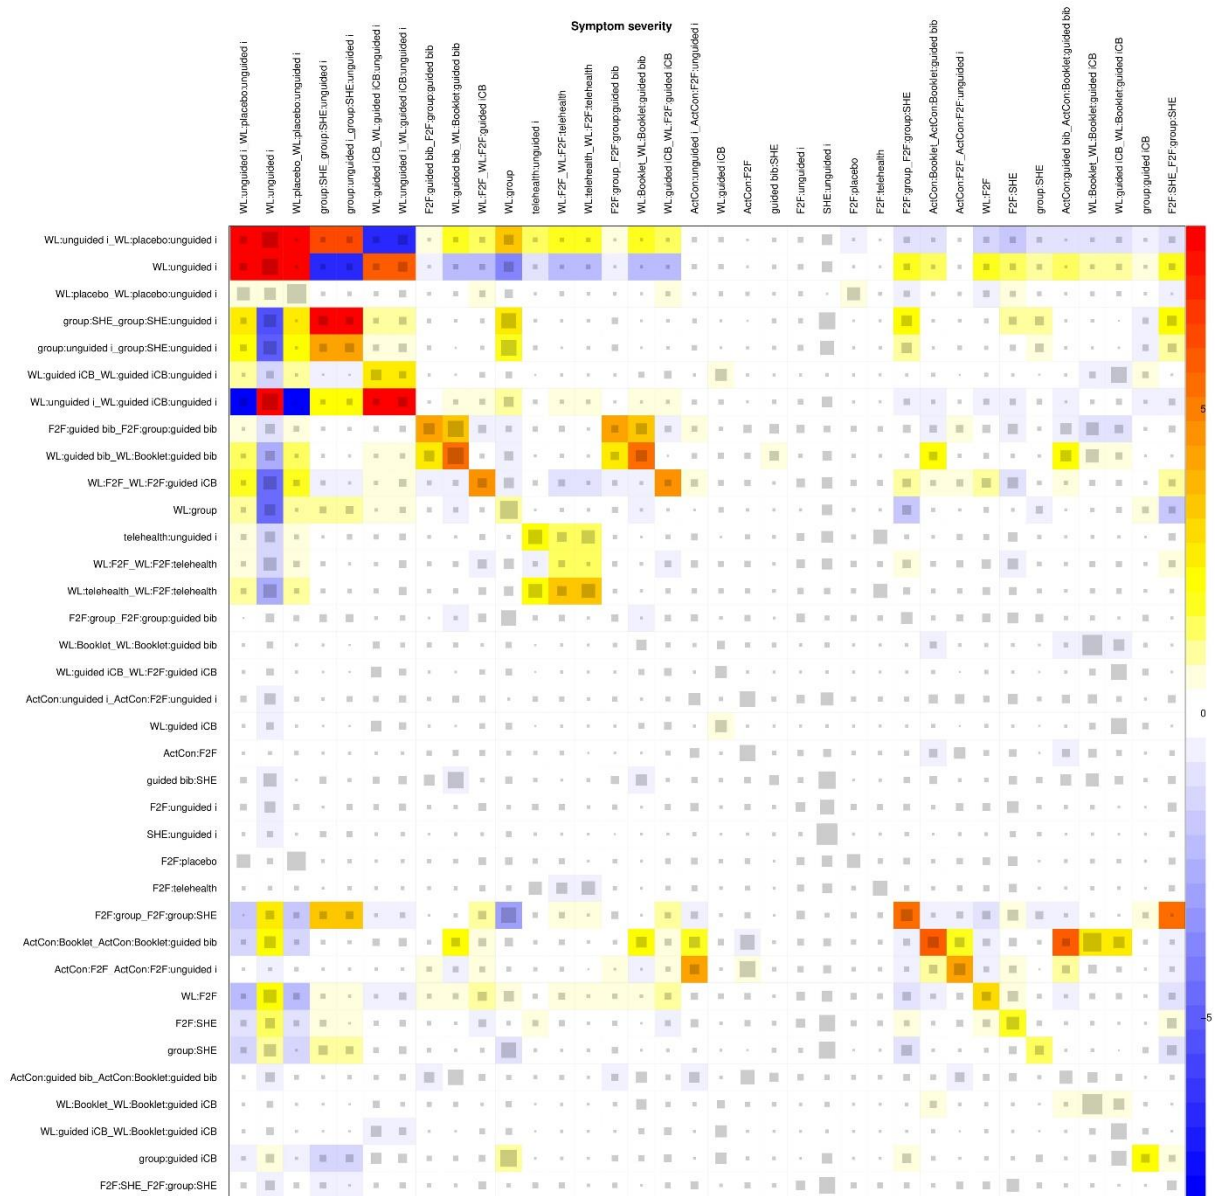

Exemplary interpretation of the net heat plot for insomnia severity:

There are several large grey squares outside of the diagonal indicating the importance of indirect evidence in the estimation of the network estimates. For example, for the estimation of unguided iCBT-I compared to WL (design from a three-armed study comparing unguided iCBT-I, WL, and placebo), the estimation of unguided iCBT-I compared to WL is an important source of indirect evidence. The following treatment comparisons contribute the most to the between-study heterogeneity: unguided iCBT-I compared to WL (design from a three-armed study comparing unguided iCBT-I, WL, and placebo), unguided iCBT-I compared to WL, group-delivered CBT-I compared to SHE (design from a three-armed study comparing group-delivered CBT-I, unguided iCBT-I, and SHE), and unguided iCBT-I compared to WL (design from a three-armed study comparing unguided iCBT-I, guided iCBT-I, and WL). Moreover, inconsistencies between indirect and direct evidence were observed for these estimates.

## Subjective sleep quality

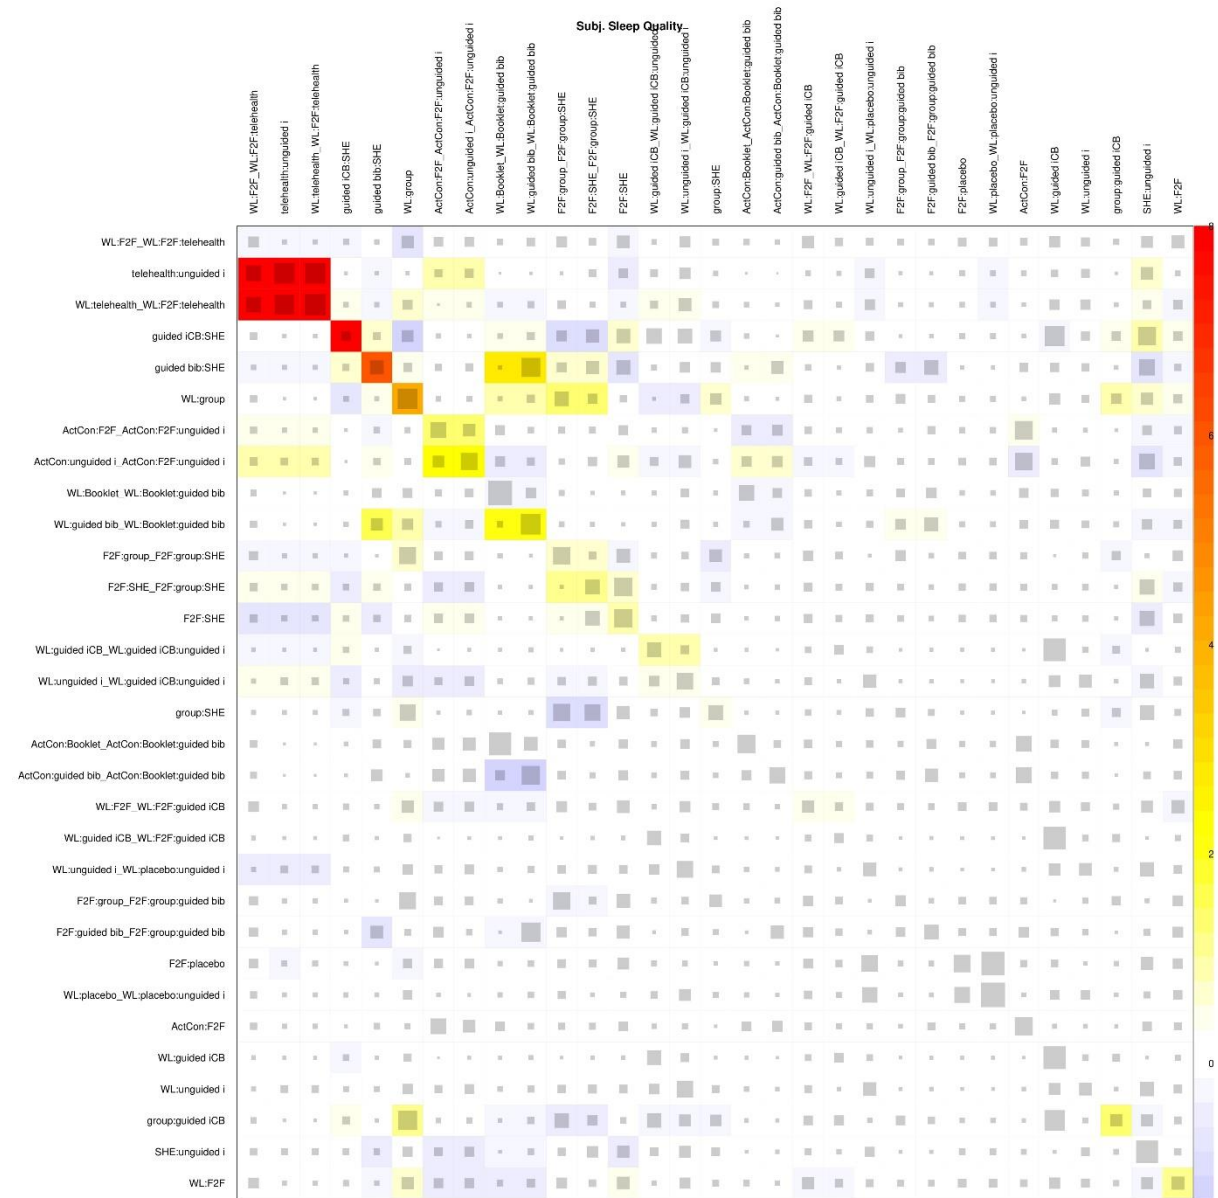



# Subjective total sleep time

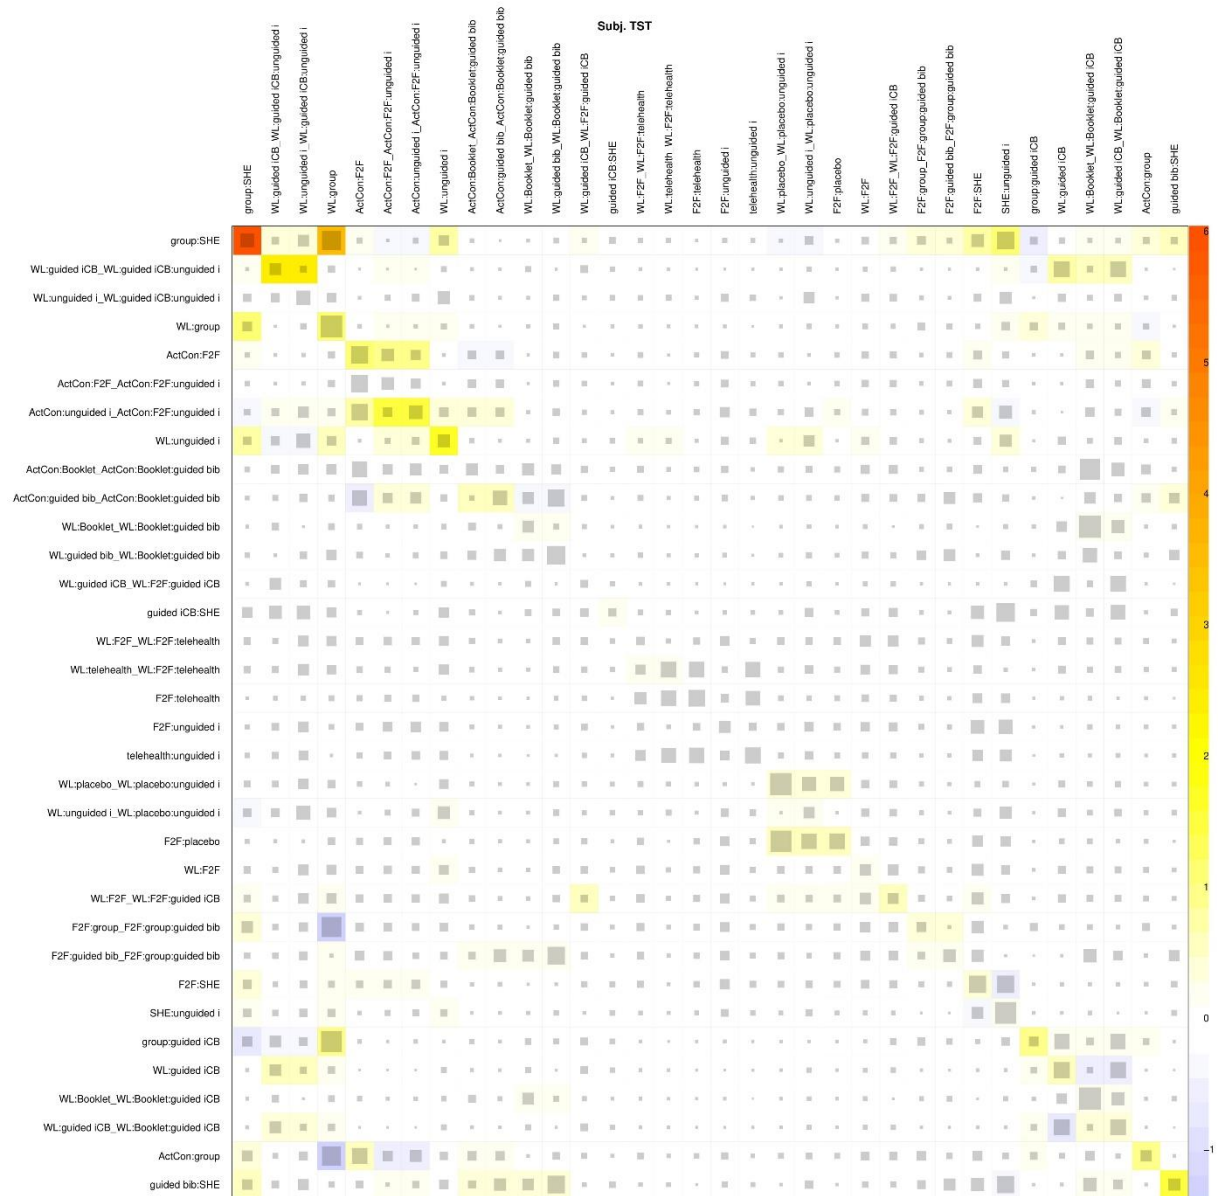

## Subjective sleep efficiency

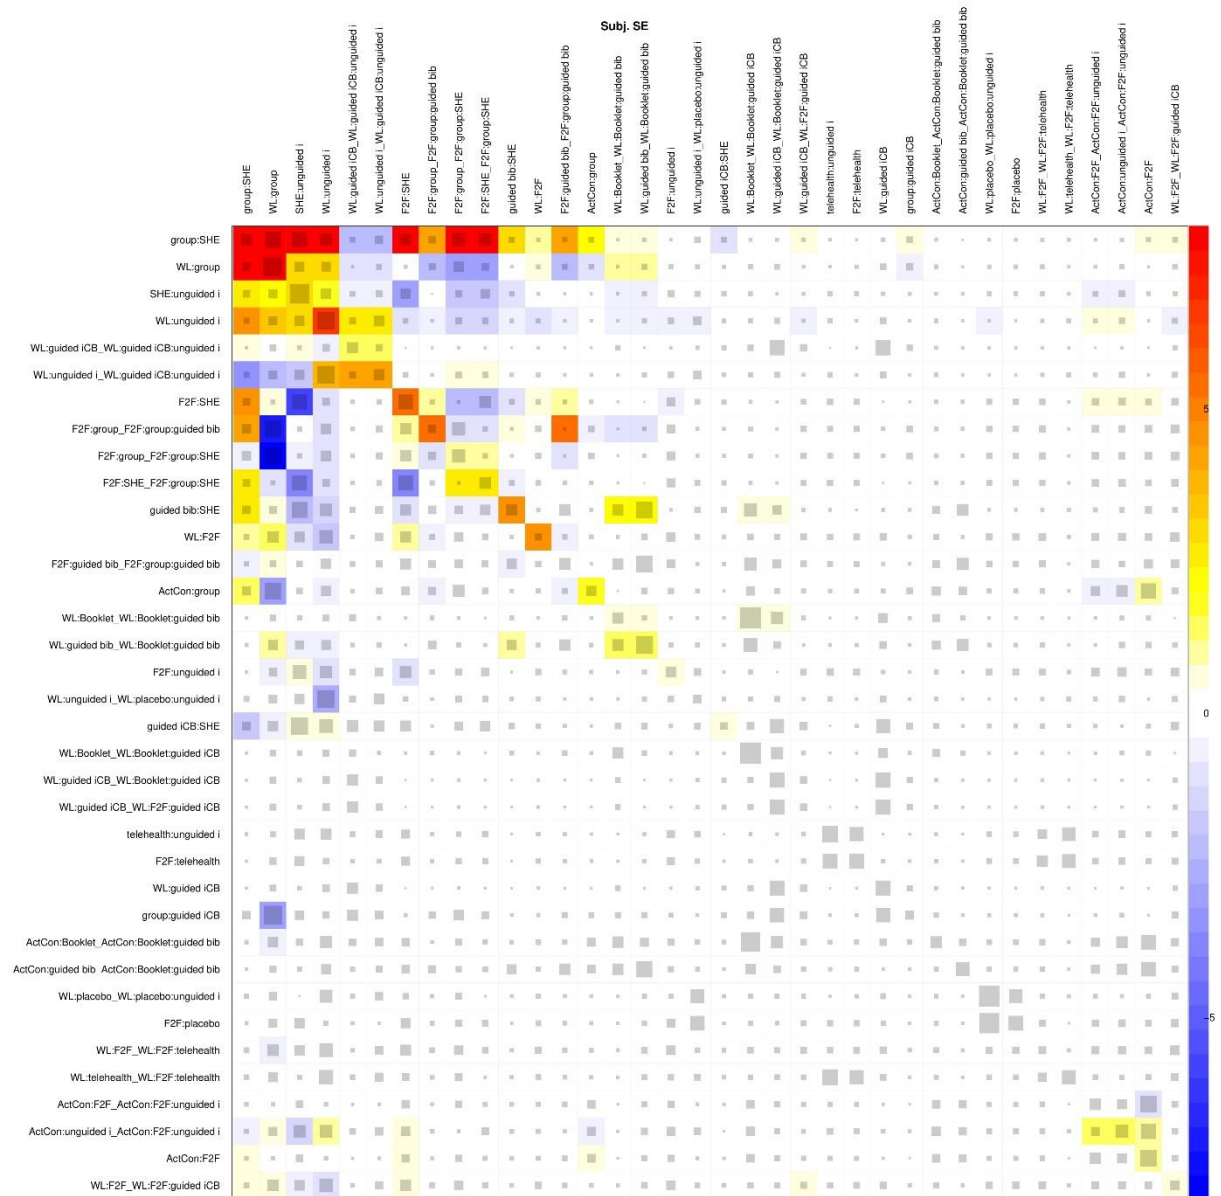

# Subjective sleep onset latency

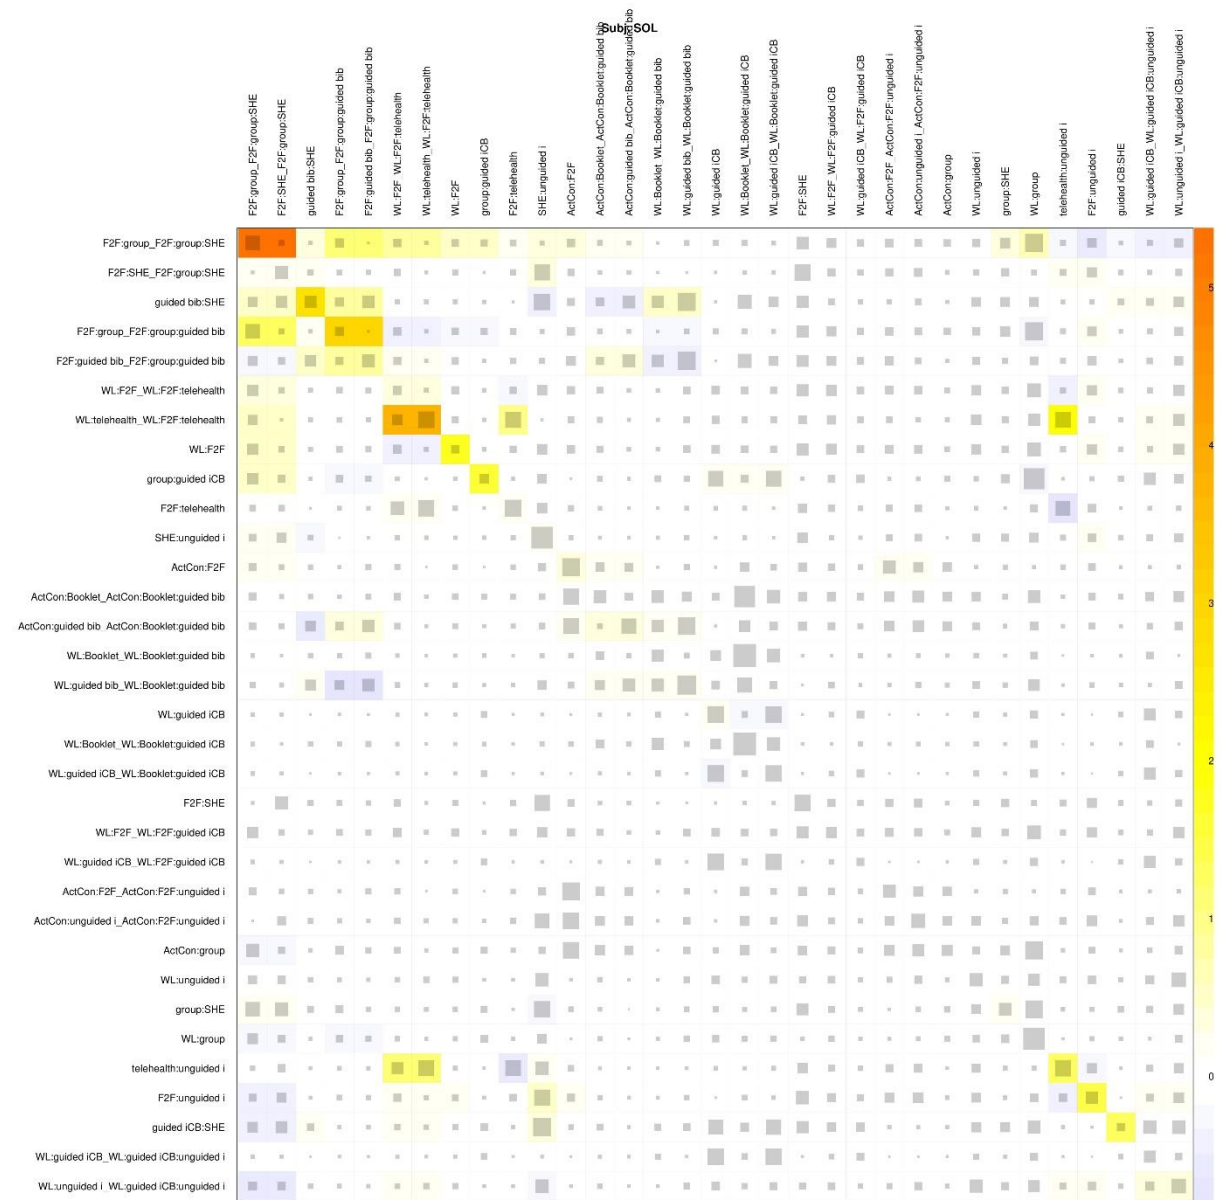

## Subjective wake after sleep onset

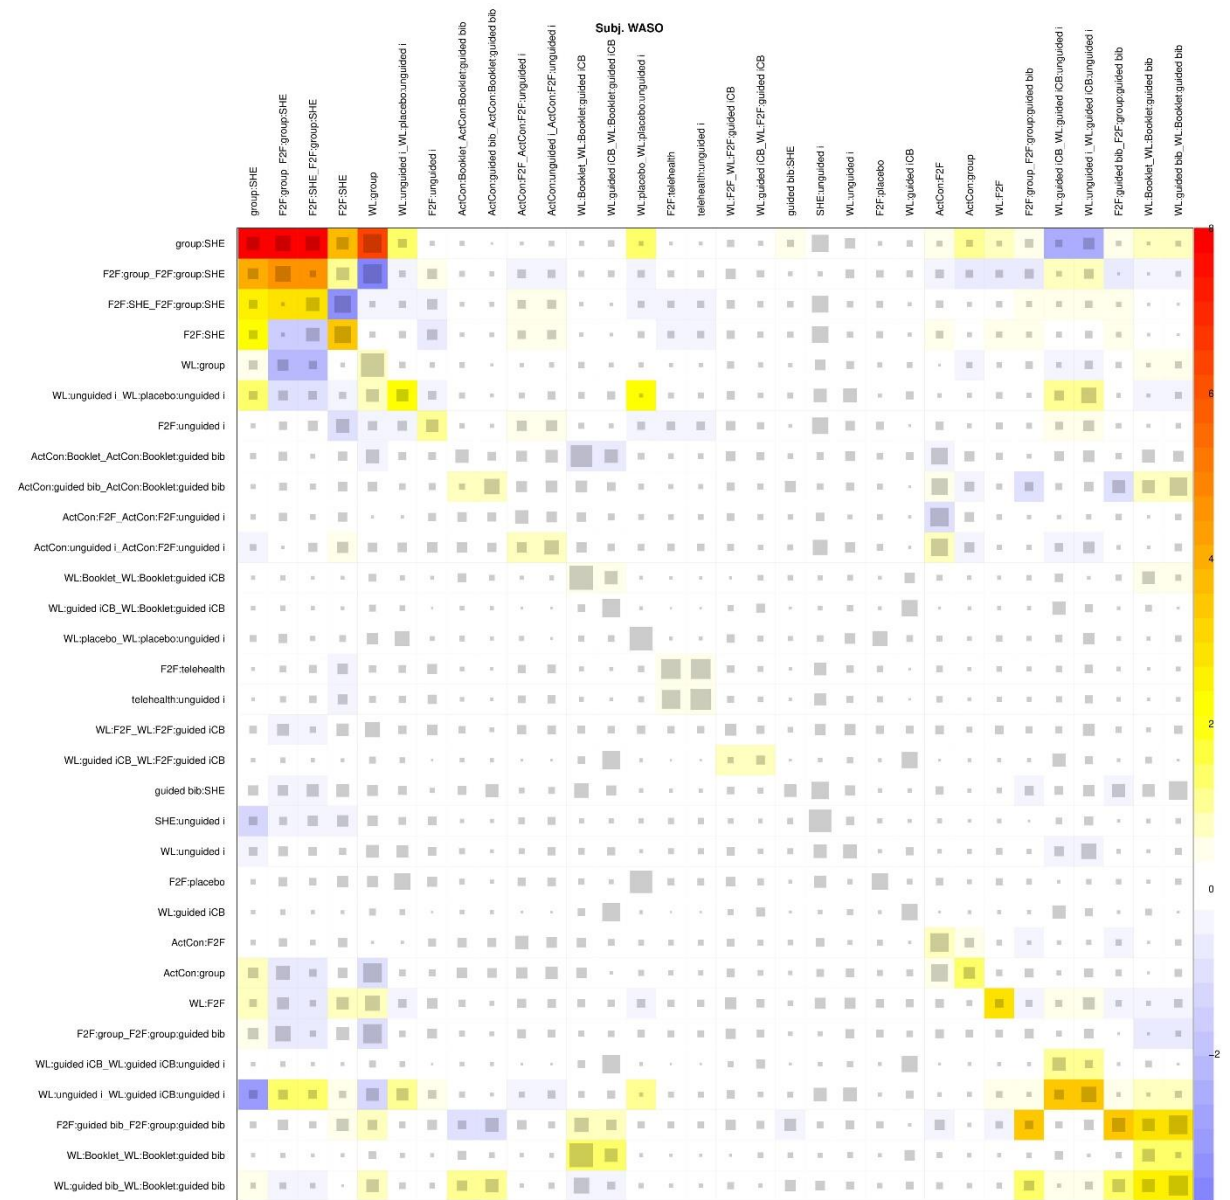

Objective total sleep time

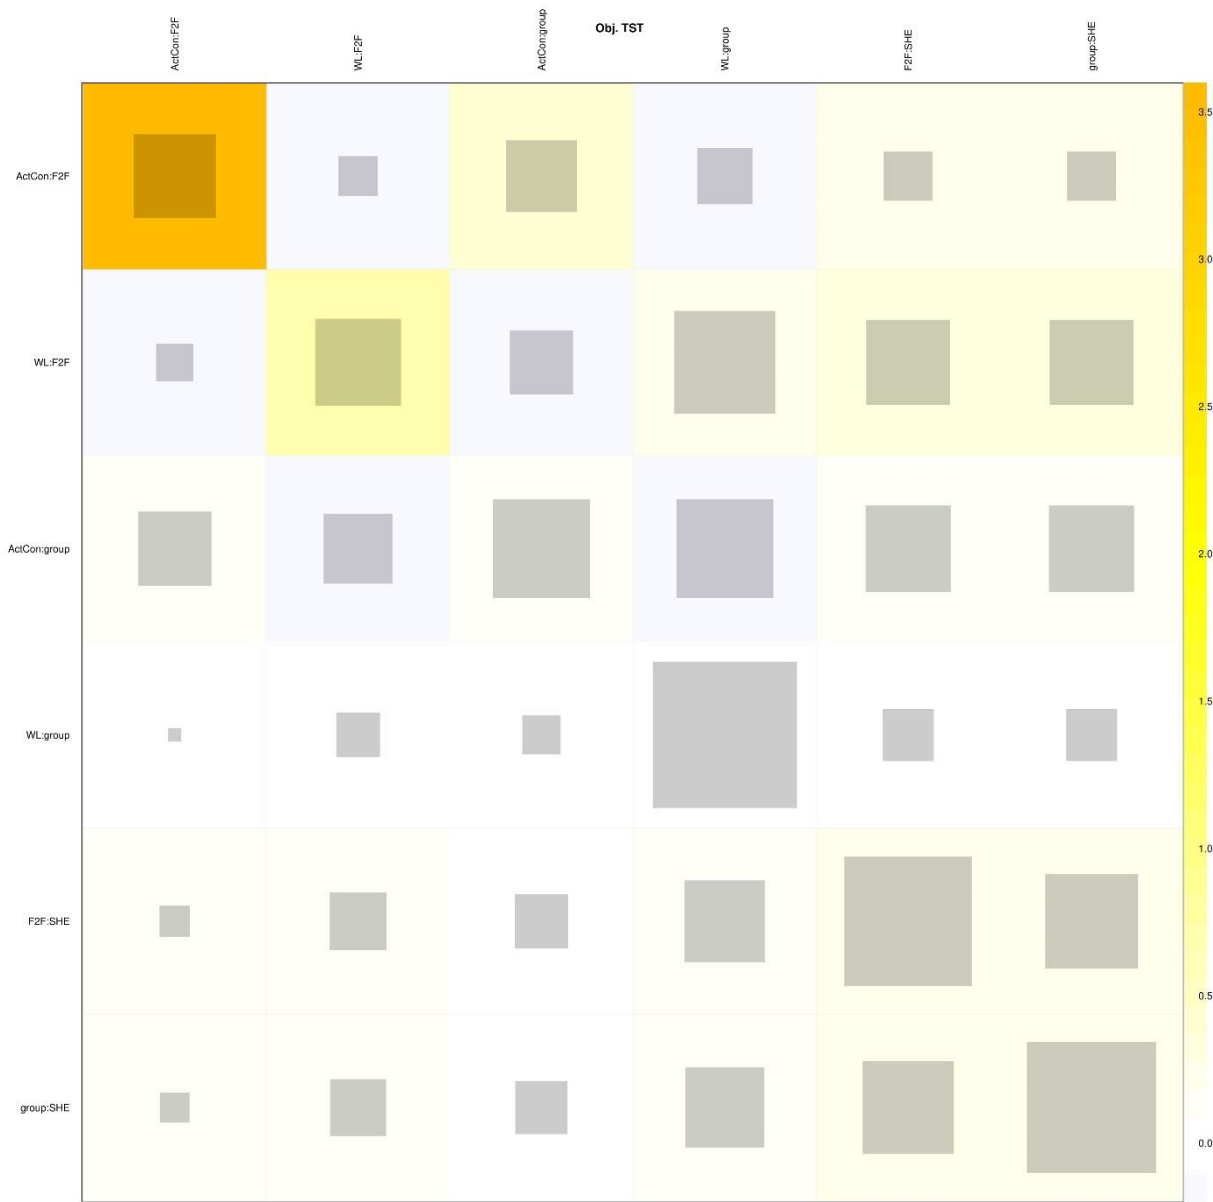

Objective sleep efficiency

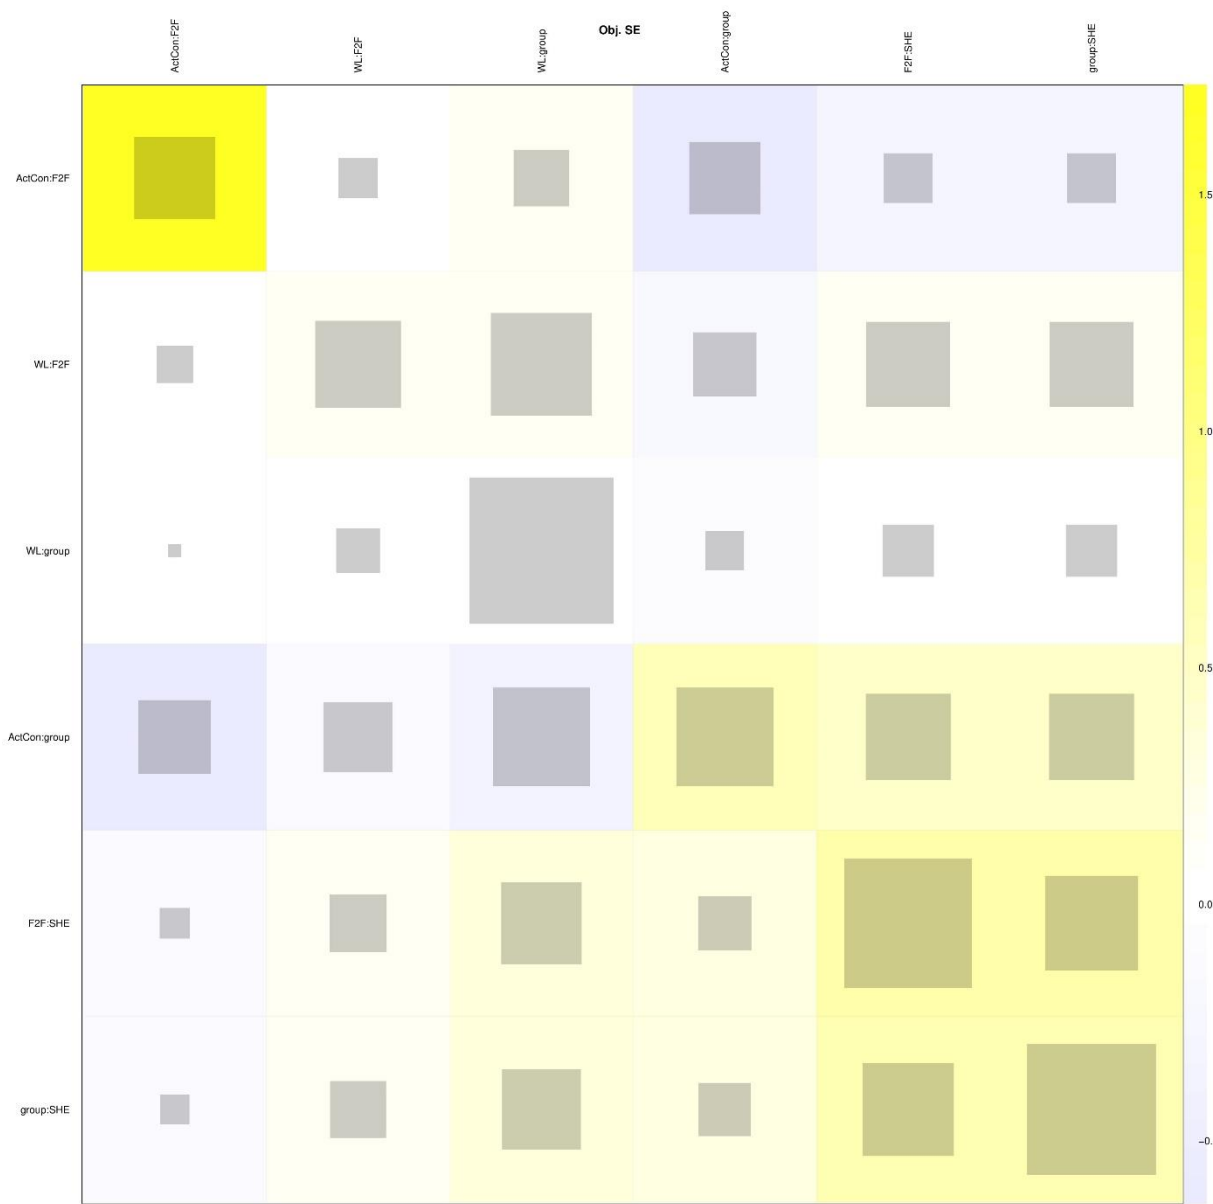

Objective sleep onset latency

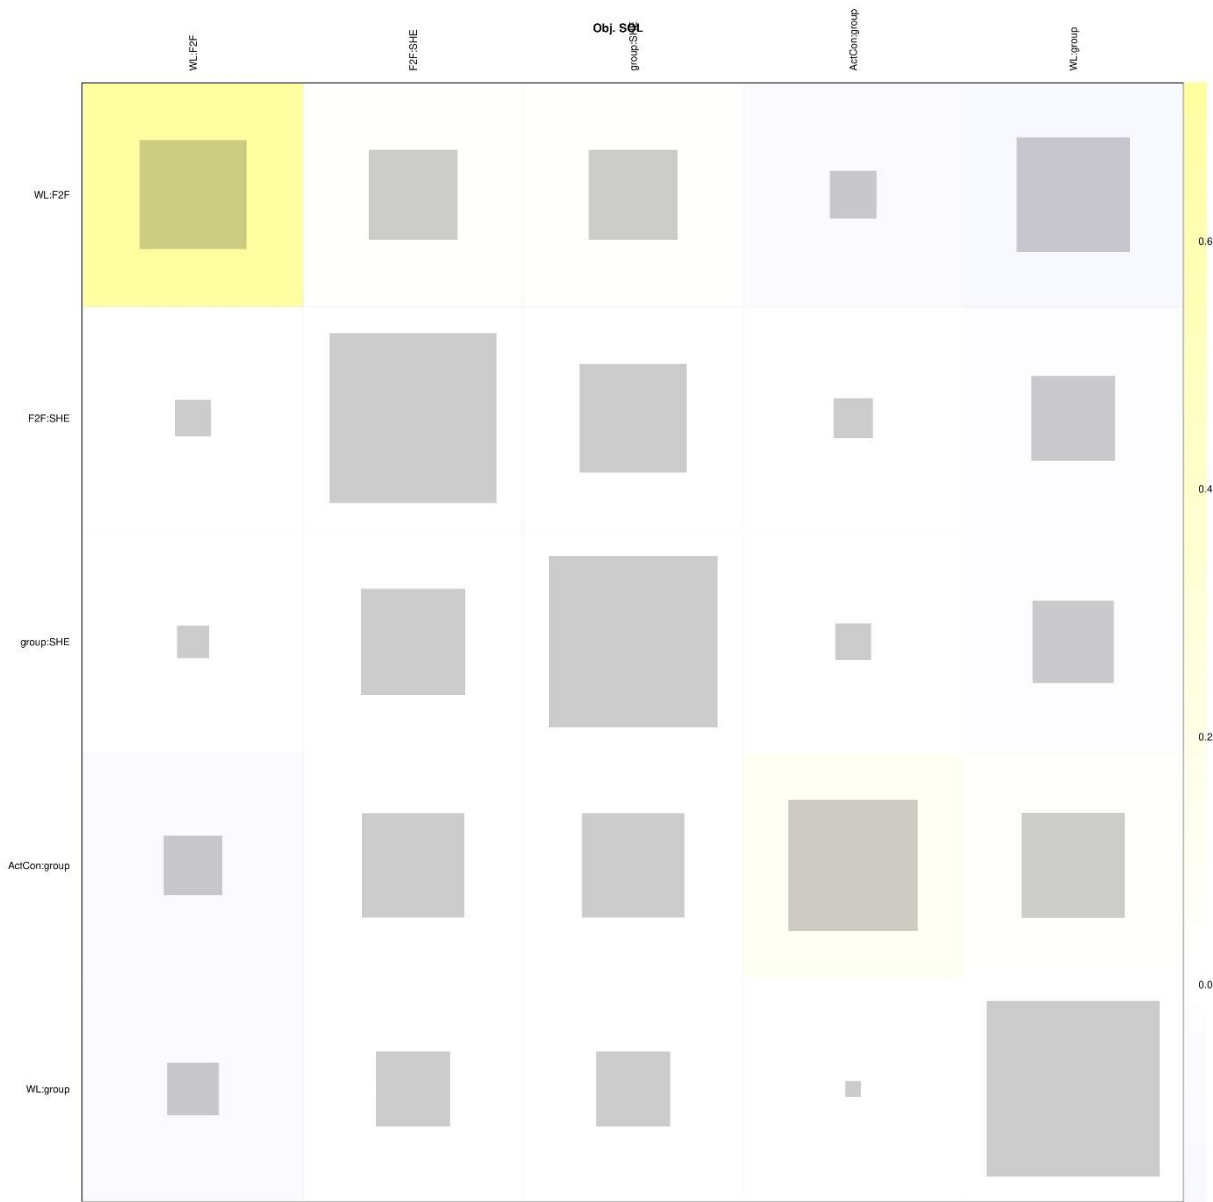

Objective wake after sleep onset

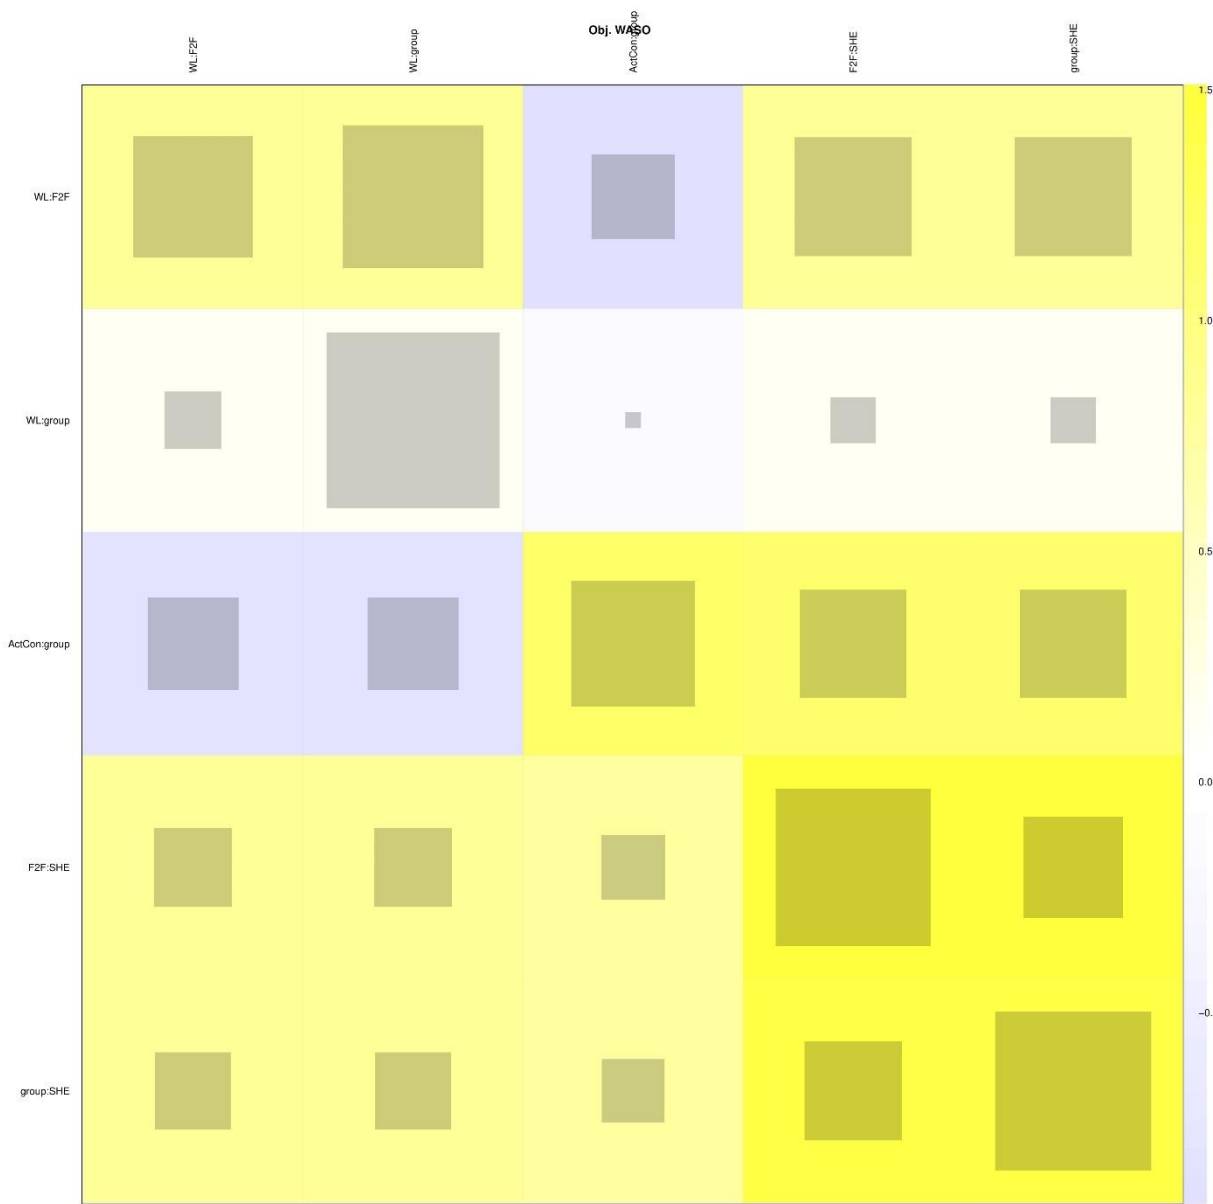



Response rates

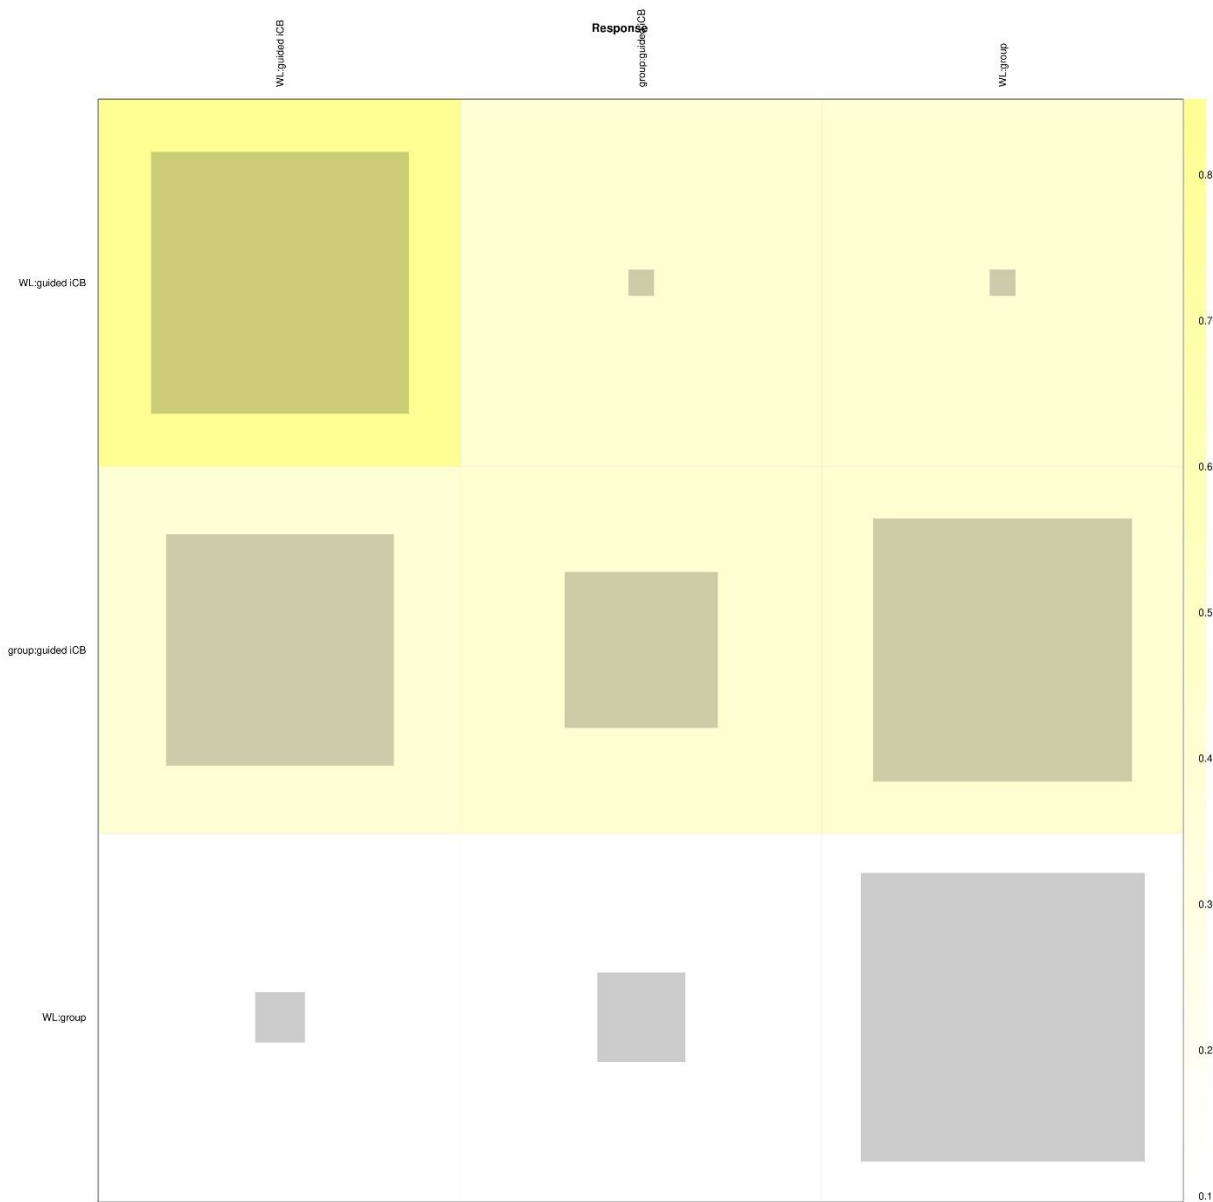

Remission rates

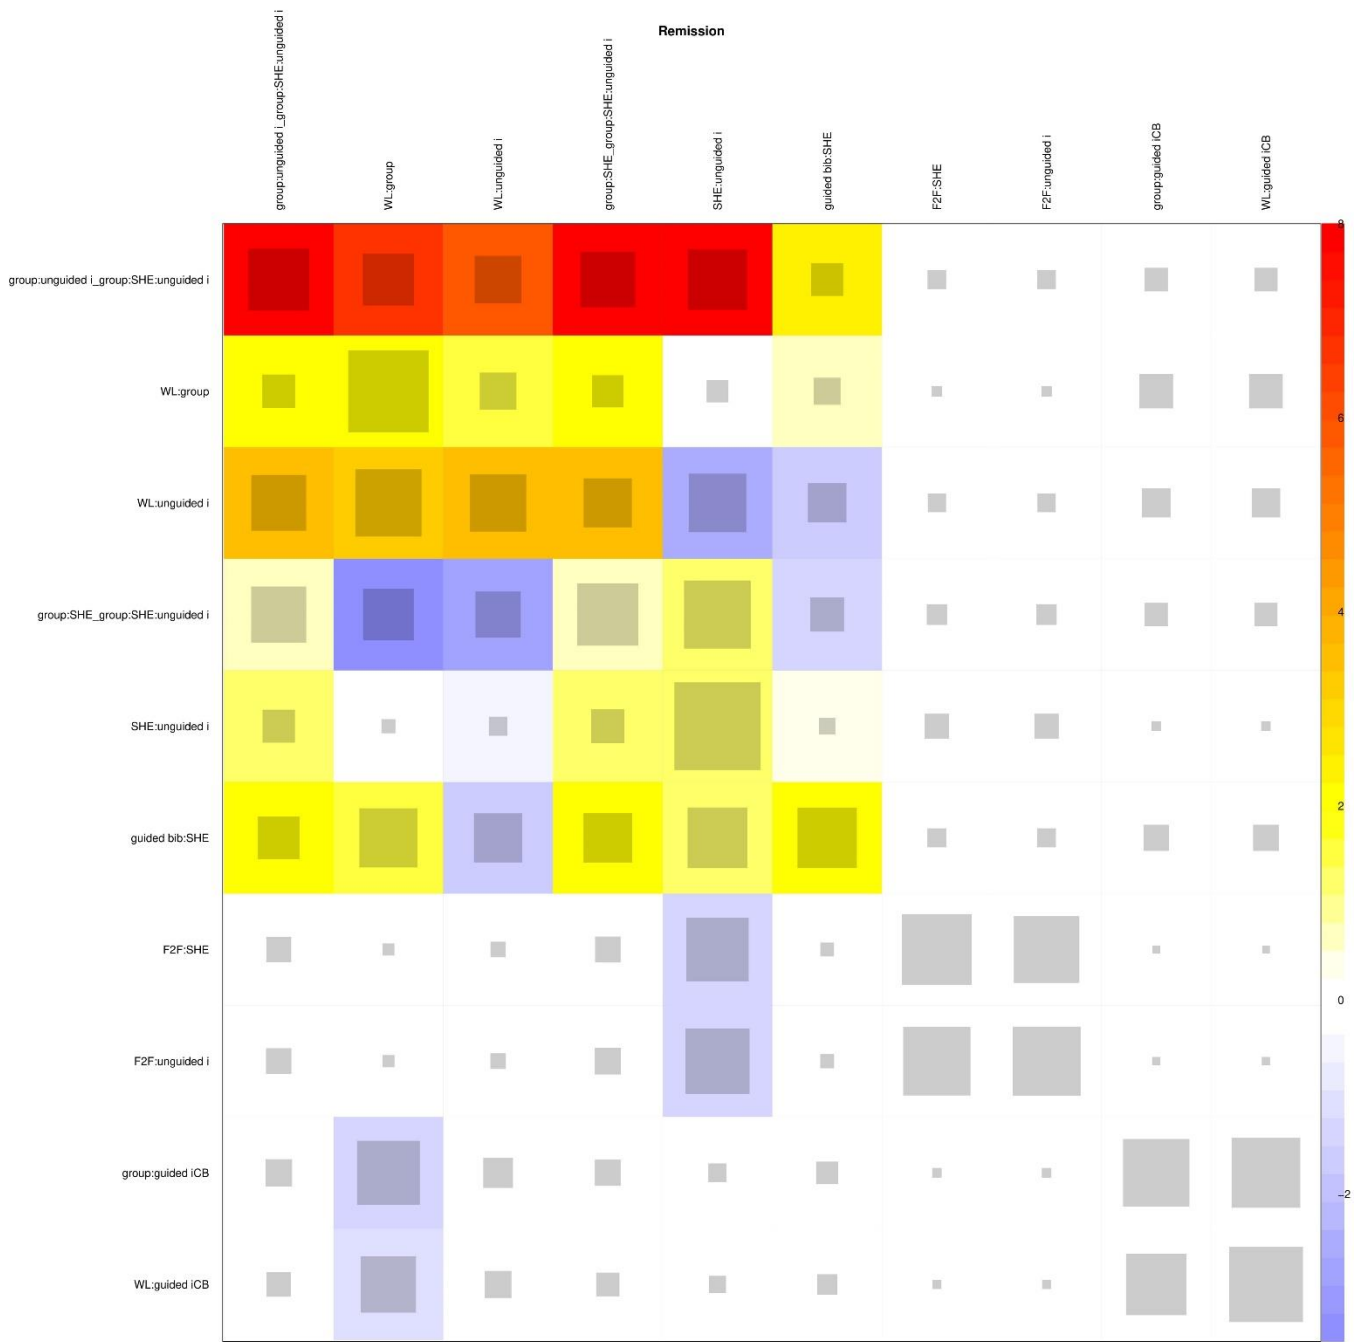

## Intervention completion rates

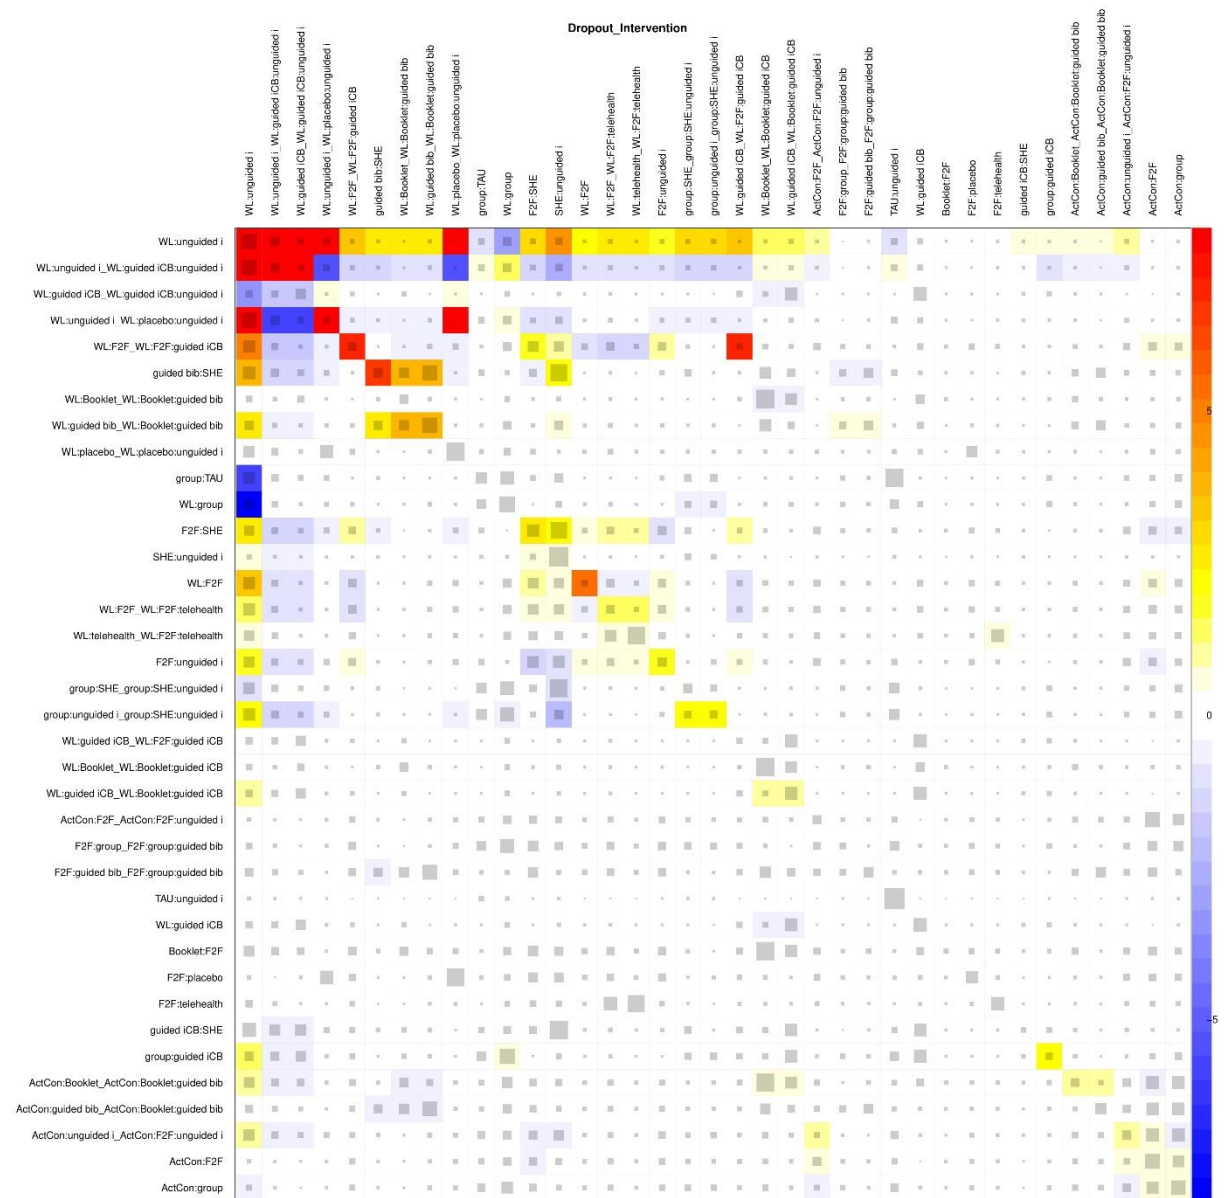

Supplementary Figure S3. Risk of Bias- summary figure

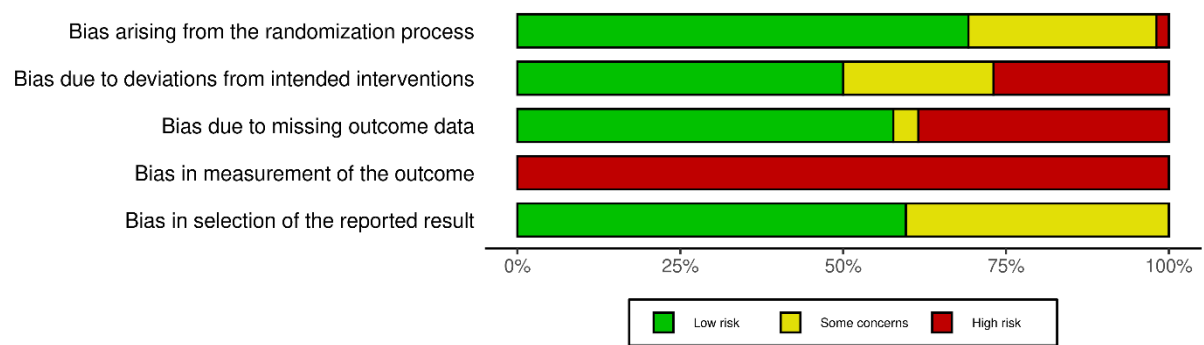

Supplementary Figure S4. Risk of Bias- detailed figure

|              | Risk of bias domains |    |    |    |    |
|--------------|----------------------|----|----|----|----|
|              | D1                   | D2 | D3 | D4 | D5 |
| AL_2016_ISI  | +                    | +  | +  | X  | +  |
| AR_2013_ISI  | -                    | +  | +  | X  | -  |
| AR_2021_ISI  | +                    | +  | +  | X  | +  |
| BA_2018_ISI  | +                    | +  | +  | X  | -  |
| BA_2004_ISI  | -                    | +  | +  | X  | -  |
| BL_2015_ISI  | +                    | -  | +  | X  | -  |
| BO_2013_ISI  | +                    | X  | +  | X  | -  |
| CH_2019_ISI  | +                    | -  | X  | X  | +  |
| DR_2019_ISI  | +                    | +  | +  | X  | +  |
| ED_2001_ISQ  | -                    | +  | +  | X  | -  |
| ED_2007_ISQ  | +                    | +  | X  | X  | -  |
| ED_2009_ISQ  | +                    | +  | X  | X  | -  |
| ES_2001_PSQI | -                    | +  | +  | X  | -  |
| ES_2012_SCI  | +                    | +  | +  | X  | +  |
| ES_2007_PSQI | +                    | X  | +  | X  | -  |
| ES_2019_SCI  | +                    | -  | +  | X  | +  |
| FR_2017_SCI  | +                    | -  | +  | X  | +  |
| GI_2019_PSQI | +                    | +  | +  | X  | +  |
| HA_2017_ISI  | +                    | -  | X  | X  | +  |
| HO_2014_ISI  | +                    | X  | X  | X  | +  |
| HOL_2014_ISI | +                    | -  | +  | X  | -  |
| IR_2014_PSQI | +                    | +  | +  | X  | +  |
| JE_2012_ISI  | +                    | +  | X  | X  | +  |
| KA_2020_ISI  | +                    | +  | +  | X  | -  |
| KR_2019_IS   | +                    | +  | +  | X  | +  |
| KY_2020_IS   | +                    | X  | X  | X  | +  |
| LA_2015_IS   | -                    | -  | X  | X  | +  |
| LA_2012_SE   | -                    | X  | X  | X  | +  |
| LA_2016_IS   | -                    | -  | X  | X  | +  |
| LOP_2019_IS  | +                    | -  | +  | X  | +  |
| LOR_2019_IS  | +                    | +  | +  | X  | +  |
| LO_2016_IS   | X                    | +  | X  | X  | -  |
| LO_2014_IS   | -                    | +  | +  | X  | -  |
| MA_2020_IS   | +                    | +  | +  | X  | +  |
| MI_1999_PSQI | +                    | +  | +  | X  | -  |
| MO_1993_SD   | -                    | +  | +  | X  | -  |
| RI_2009_IS   | -                    | +  | +  | X  | -  |
| RI_2017_IS   | +                    | -  | X  | X  | +  |
| SA_2018_IS   | +                    | X  | X  | X  | +  |
| SA_2019_PS   | +                    | +  | +  | X  | +  |
| ST_2004_SQ   | -                    | X  | X  | X  | -  |
| TA_2018_IS   | -                    | X  | X  | X  | -  |
| TA_2017_IS   | -                    | X  | X  | X  | -  |
| TA_2014_IS   | +                    | X  | -  | X  | -  |
| VA_2020_IS   | +                    | X  | X  | X  | +  |
| VA_2014_PS   | +                    | +  | X  | X  | +  |
| VI_2009_IS   | -                    | X  | -  | X  | +  |
| WO_2021_IS   | +                    | X  | X  | X  | +  |
| HO_2021_IS   | +                    | X  | X  | X  | +  |
| JO_2020_IS   | +                    | +  | +  | X  | +  |
| KA_2021_IS   | +                    | -  | +  | X  | +  |
| GE_2021_ISI  | -                    | -  | +  | X  | +  |

Study

Domains:  
D1: Bias arising from the randomization process.  
D2: Bias due to deviations from intended intervention.  
D3: Bias due to missing outcome data.  
D4: Bias in measurement of the outcome.  
D5: Bias in selection of the reported result.

Judgement  
X High  
- Some concerns  
+ Low

## Supplementary Figures S5. Comparison-adjusted funnel plots

### Insomnia severity

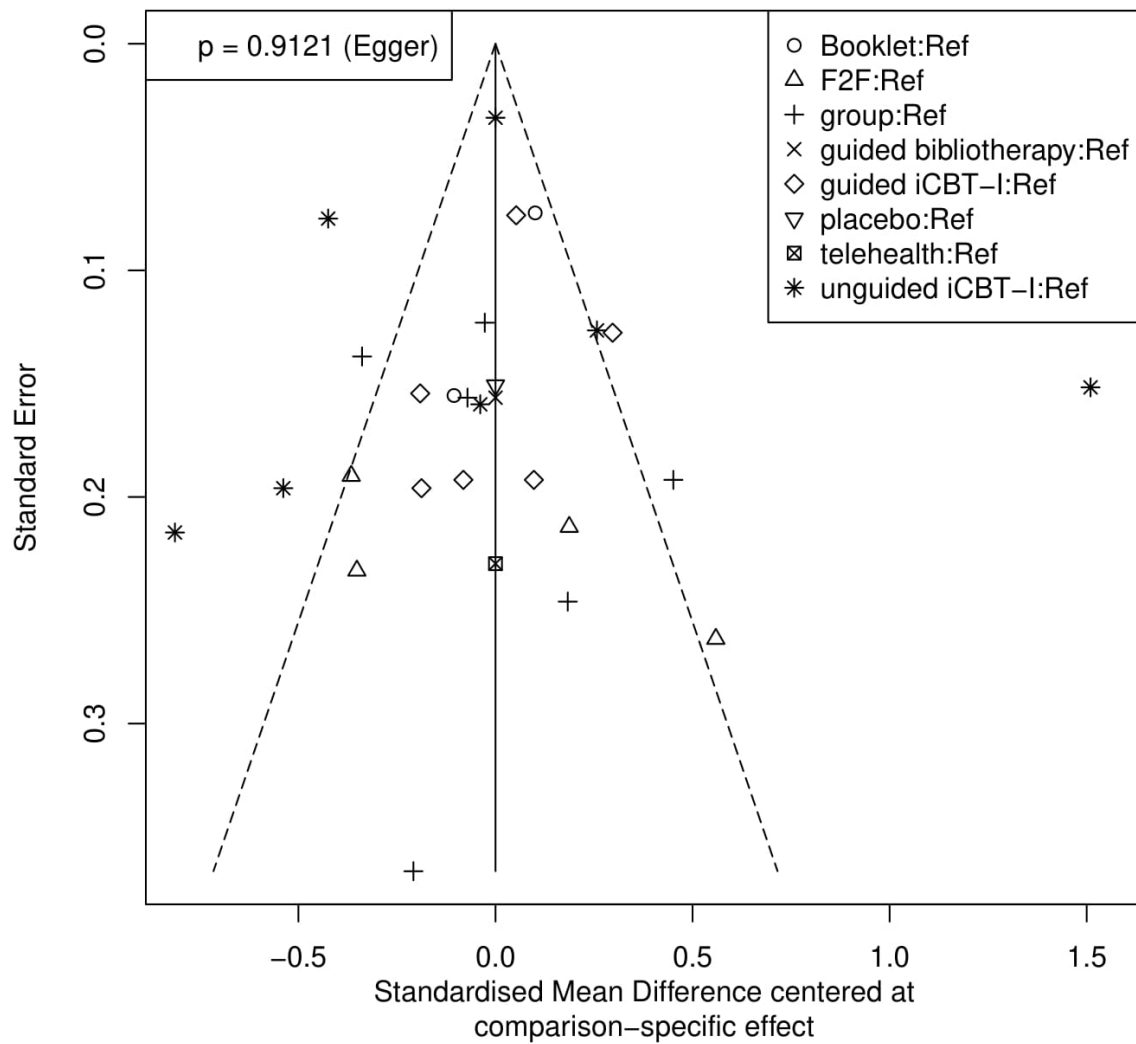

### Subjective sleep quality

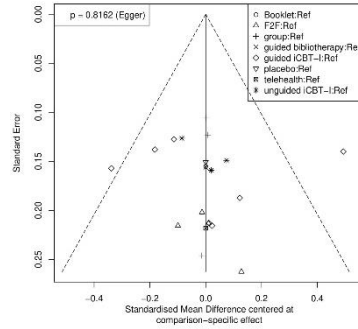

### Subjective total sleep time

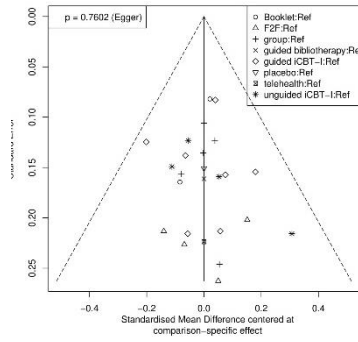

### Subjective sleep efficiency

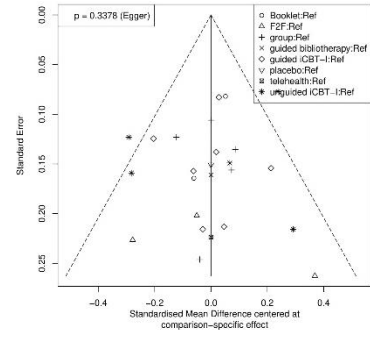

### Subjective sleep onset latency

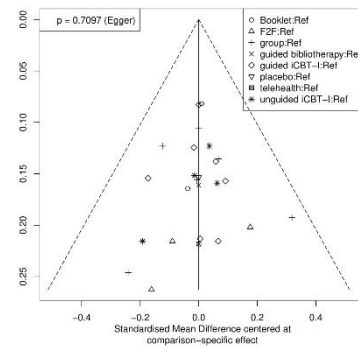

### Subjective wake after sleep onset

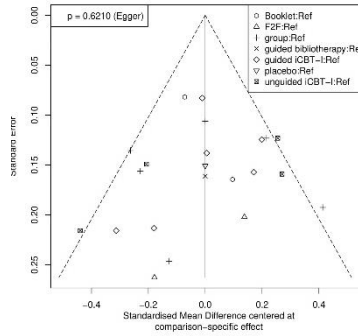

### Objective total sleep time

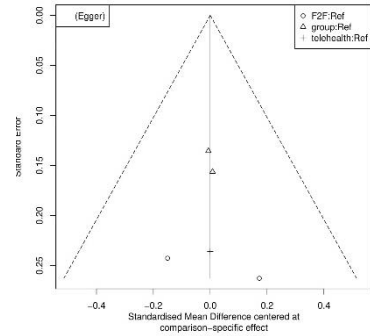

### Objective sleep efficiency

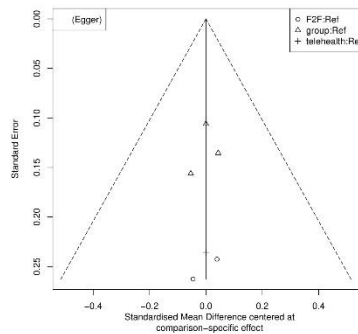

### Objective sleep onset latency

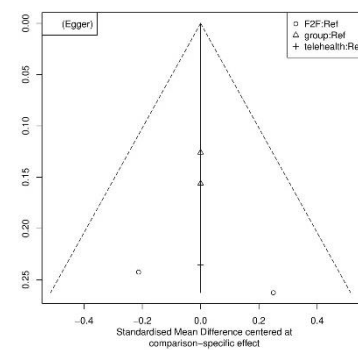

### Objective wake after sleep onset

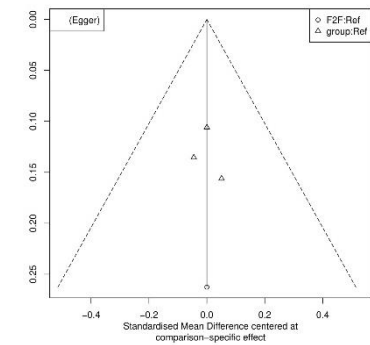

Supplement: MOESM1 [file 41598_2023_28853_MOESM1_ESM.pdf]
